# Supplementary material
Source: PubMed Central journal article supplement (PMC4856766)
Supplement: cr201644x1.pdf [file cr201644x1.pdf]

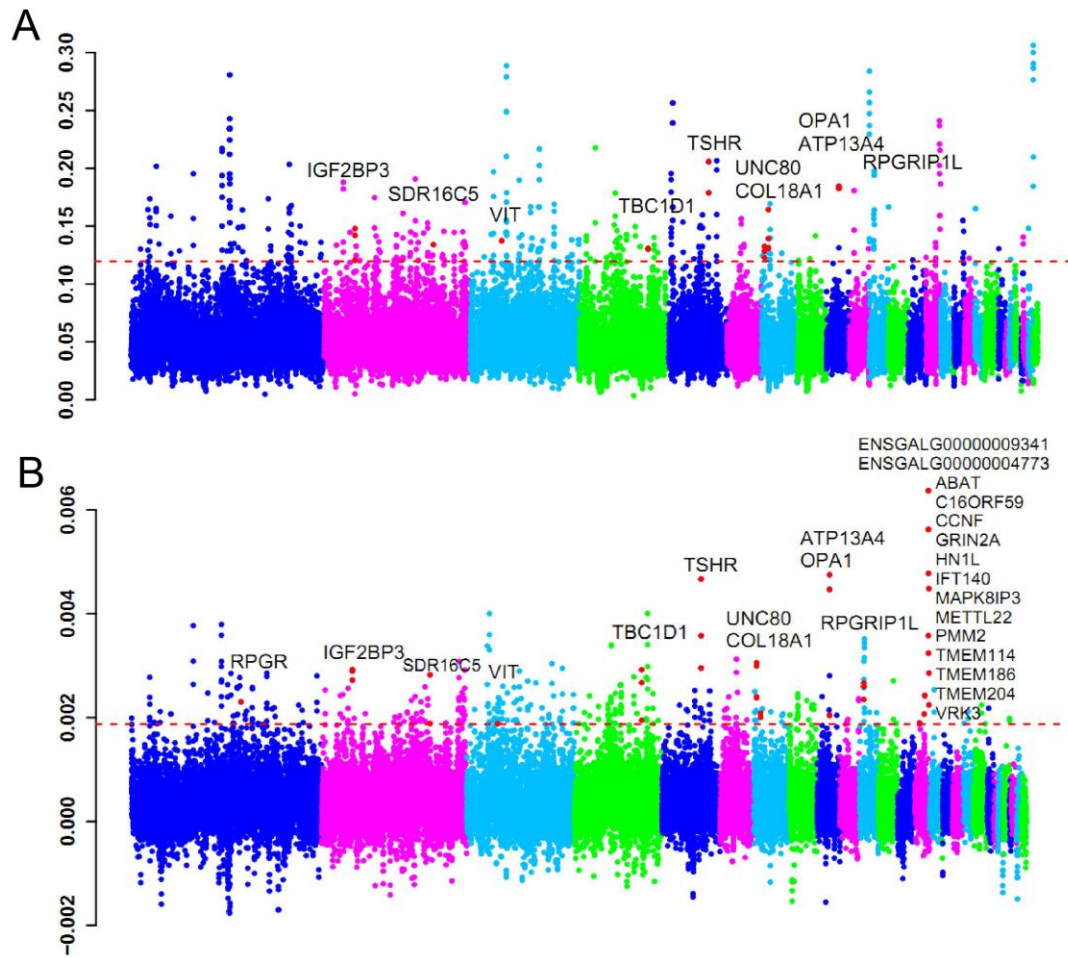

**Supplementary information, Figure S1** Genomic landscape of the  $F_{ST}$  values (**A**) and  $\Delta P_i$  values (**B**) in the genomes of the domestic chickens.
