# Supplementary material
Source: PubMed Central journal article supplement (PMC4856766)
Supplement: cr201644x3.pdf [file cr201644x3.pdf]

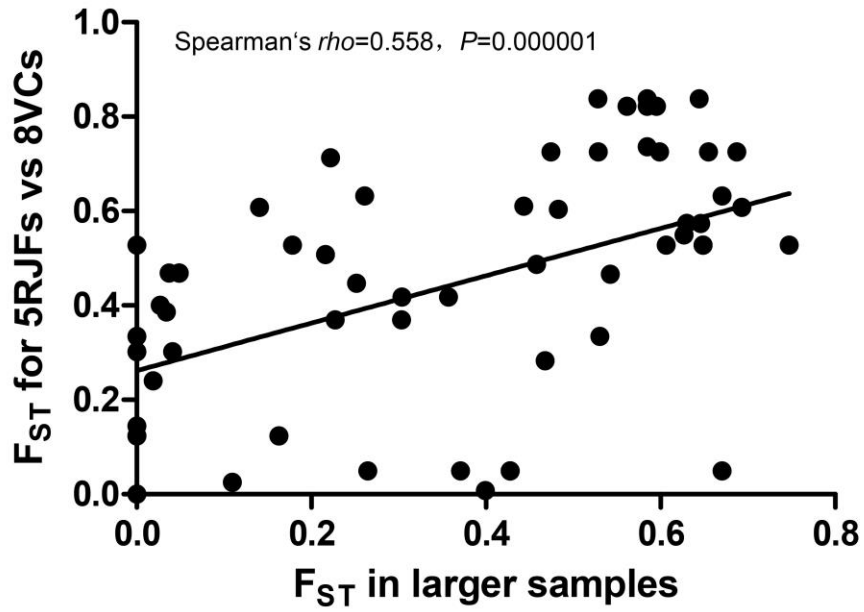

**Supplementary information, Figure S3** Correlation for  $F_{ST}$  computed in (5RJFs vs 8VCs) and larger population (~25 RJFs vs ~20 VCs).
