# Supplementary material
Source: PubMed Central journal article supplement (PMC4856766)
Supplement: cr201644x5.pdf [file cr201644x5.pdf]

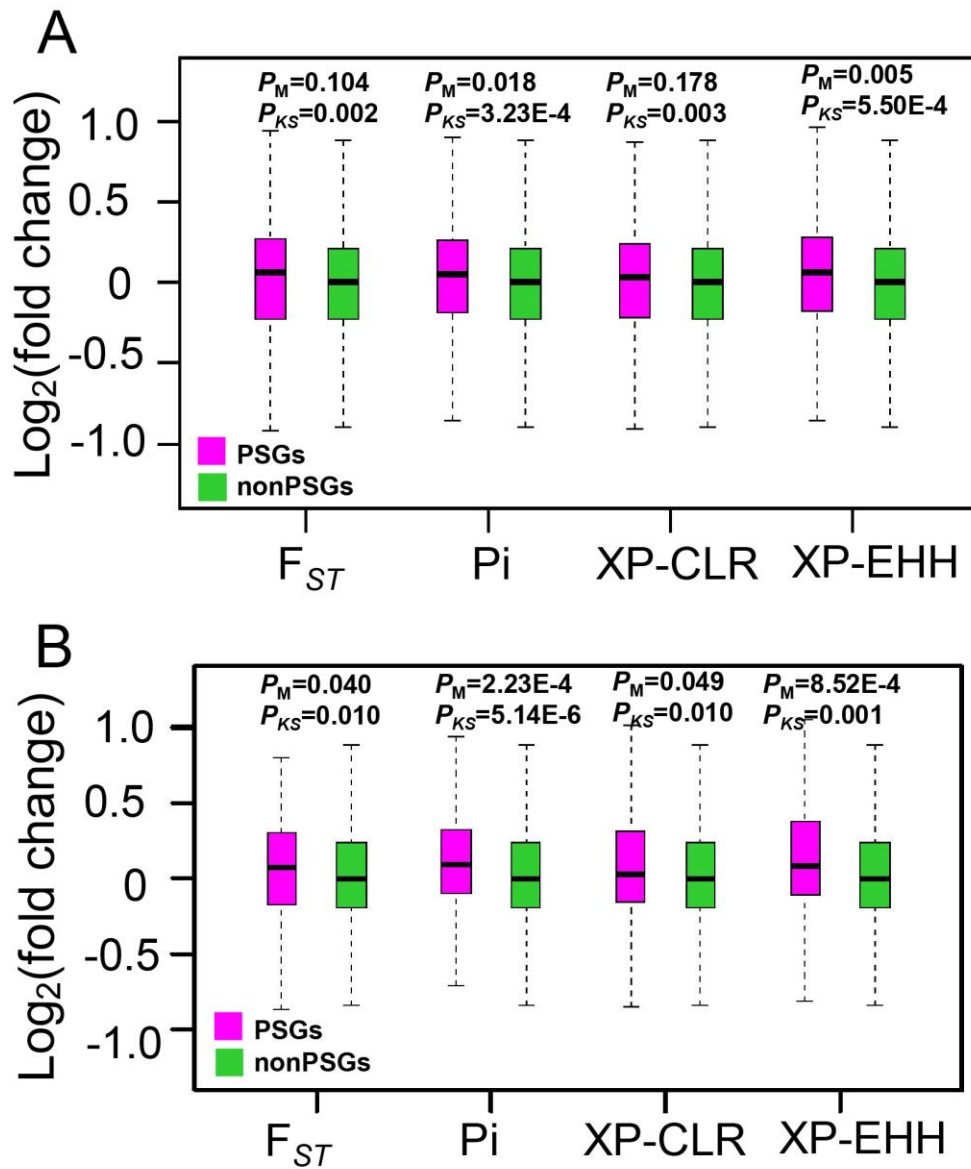

**Supplementary information, Figure S5** Differences in gene expression in eye for PSGs identified by  $F_{ST}$ , Pi, XP-CLR and XP-EHH compared with non-PSGs based on transcriptomes generated on Hiseq4000 platform (**A**) and combining Hiseq 2000 platform and Hiseq4000 platform together (**B**).  $P_M$  and  $P_{KS}$  mean values were calculated by Mann-Whitney U test and Kolmogorov-Smirnov test, respectively.
