# Supplementary material
Source: PubMed Central journal article supplement (PMC4856766)
Supplement: cr201644x10.pdf [file cr201644x10.pdf]

**Supplementary information, Table S1** Village chicken and Red Junglefowl genome sequence information

| <b>Breeds</b>    | <b>NO. runs</b> | <b>No. reads</b> | <b>Data size (Gbp)</b> | <b>Sequence depth</b> |
|------------------|-----------------|------------------|------------------------|-----------------------|
| village chicken1 | 2               | 231220158        | 17.28                  | 15.3291               |
| village chicken2 | 2               | 206893558        | 17.81                  | 16.5434               |
| village chicken3 | 3               | 266469886        | 29.69                  | 19.5379               |
| village chicken4 | 3               | 301822858        | 26.72                  | 18.6694               |
| village chicken5 | 2               | 269483358        | 17.81                  | 10.8655               |
| village chicken6 | 2               | 235001290        | 23.75                  | 19.2231               |
| village chicken7 | 2               | 178477396        | 17.81                  | 14.5754               |
| village chicken8 | 3               | 508596074        | 55.31                  | 31.95                 |
| Red Junglefowl1  | 3               | 177458494        | 26.18                  | 11.6534               |
| Red Junglefowl2  | 2               | 286042830        | 17.81                  | 23.3578               |
| Red Junglefowl3  | 2               | 186436306        | 17.28                  | 14.1309               |
| Red Junglefowl4  | 2               | 223851144        | 17.28                  | 17.2666               |
| Red Junglefowl5  | 2               | 402348272        | 37.5                   | 32.4167               |
