# Supplementary material
Source: PubMed Central journal article supplement (PMC4856766)
Supplement: cr201644x12.pdf [file cr201644x12.pdf]

**Supplementary information, Table S3** Distribution of SNPs

| <b>Terms</b>      | <b>Number</b> | <b>Proportion</b> |
|-------------------|---------------|-------------------|
| <b>exonic</b>     | 246336        | 1.44%             |
| <b>intronic</b>   | 7367199       | 43.04%            |
| <b>intergenic</b> | 8823233       | 51.55%            |
| <b>UTRs</b>       | 213394        | 1.25%             |
| <b>others</b>     | 465213        | 2.72%             |
| <b>Total</b>      | 17115375      | 100.00%           |
