# Supplementary material
Source: PubMed Central journal article supplement (PMC4856766)
Supplement: cr201644x13.pdf [file cr201644x13.pdf]

**Supplementary information, Table S4** Distribution of SNPs located in protein coding regions

|                       | <b>Synonymous</b> | <b>Nonsynonymous</b> | <b>Stop gain</b> | <b>Stop loss</b> |
|-----------------------|-------------------|----------------------|------------------|------------------|
| Number of SNV         | 174748            | 70990                | 506              | 58               |
| Number of genes       | 13779             | 11531                | 445              | 57               |
| Number of transcripts | 563               | 12111                | 446              | 57               |
