# Supplementary material
Source: PubMed Central journal article supplement (PMC4856766)
Supplement: cr201644x14.pdf [file cr201644x14.pdf]

**Supplementary information, Table S5 Results for 67 SNPs validated in larger population**

| Chr | Position | Ref allele | Alt allele | Number of RJF | Number of VC | FST in larger samples | FST for 5RJFs vs 8VCs | Overlapped genes   |
|-----|----------|------------|------------|---------------|--------------|-----------------------|-----------------------|--------------------|
| 2   | 80326793 | C          | T          | 31            | 26           | 0.629903087           | 0.574021614           | intergenic         |
| 2   | 80326818 | T          | C          | 31            | 26           | 0.629903087           | 0.574021614           | intergenic         |
| 2   | 80326839 | A          | C          | 31            | 26           | 0.629903087           | 0.574021614           | intergenic         |
| 2   | 80326840 | A          | T          | 31            | 26           | 0.629903087           | 0.574021614           | intergenic         |
| 2   | 80326866 | G          | C          | 31            | 25           | 0.645921577           | 0.574021614           | intergenic         |
| 5   | 40092110 | G          | C          | 27            | 20           | 0.747457033           | 0.528023599           | TSHR(downstream)   |
| 5   | 40092012 | G          | A          | 25            | 20           | 0.606600372           | 0.528023599           | TSHR(downstream)   |
| 5   | 40092286 | G          | A          | 25            | 20           | 0.64881475            | 0.528023599           | TSHR(downstream)   |
| 5   | 40092309 | G          | A          | 25            | 20           | 0.64881475            | 0.528023599           | TSHR(downstream)   |
| 5   | 40092338 | A          | G          | 25            | 20           | 0.64881475            | 0.528023599           | TSHR(downstream)   |
| 9   | 12584591 | T          | C          | 30            | 24           | 0.303592891           | 0.418181818           | ATP13A4            |
| 9   | 12584847 | T          | G          | 29            | 24           | 0.670237929           | 0.632183908           | ATP13A4            |
| 9   | 12584853 | T          | G          | 29            | 24           | 0.357273768           | 0.418181818           | ATP13A4            |
| 9   | 12584874 | G          | A          | 29            | 24           | 0.670237929           | 0.04950495            | ATP13A4            |
| 11  | 4363346  | T          | G          | 28            | 20           | 0.626972457           | 0.549295775           | RPGRIP1L           |
| 11  | 4363390  | C          | T          | 28            | 20           | 0                     | 0                     | RPGRIP1L           |
| 11  | 4363778  | C          | T          | 28            | 20           | 0.542398101           | 0.466282144           | RPGRIP1L           |
| 11  | 4363787  | G          | A          | 28            | 20           | 0.467915606           | 0.283267457           | RPGRIP1L           |
| 7   | 6649854  | C          | A          | 28            | 22           | 0.443423046           | 0.610705596           | COL18A1 (upstream) |
| 7   | 6649878  | A          | G          | 28            | 22           | 0.227269817           | 0.369853204           | COL18A1 (upstream) |
| 7   | 6650054  | G          | A          | 27            | 22           | 0.371091062           | 0.04950495            | COL18A1 (upstream) |
| 7   | 6650120  | T          | C          | 27            | 22           | 0.427655161           | 0.04950495            | COL18A1 (upstream) |
| 7   | 6650129  | G          | A          | 27            | 22           | 0.303552043           | 0.369853204           | COL18A1 (upstream) |
| 7   | 6650196  | C          | T          | 27            | 22           | 0.427655161           | 0.04950495            | COL18A1 (upstream) |
| 7   | 6650160  | A          | T          | 27            | 22           | 0.427655161           | 0.04950495            | COL18A1 (upstream) |
| 9   | 12546345 | A          | G          | 31            | 23           | 0.02676464            | 0.400749064           | OPA1               |
| 9   | 12546387 | A          | G          | 31            | 23           | 0.048581794           | 0.468942627           | OPA1               |
| 9   | 12546416 | C          | G          | 31            | 23           | 0.048581794           | 0.468942627           | OPA1               |

|   |          |   |   |    |    |             |             |            |
|---|----------|---|---|----|----|-------------|-------------|------------|
| 9 | 12546421 | G | T | 31 | 23 | 0.037141971 | 0.468942627 | OPA1       |
| 9 | 12546426 | C | T | 31 | 23 | 0.048581794 | 0.468942627 | OPA1       |
| 9 | 12546495 | C | T | 31 | 23 | 0.034167181 | 0.386518244 | OPA1       |
| 9 | 12546566 | T | G | 31 | 23 | 0           | 0.334257975 | OPA1       |
| 9 | 12546613 | C | A | 31 | 23 | 0.178307316 | 0.528023599 | OPA1       |
| 9 | 12546701 | G | A | 31 | 23 | 0.109406819 | 0.025239339 | OPA1       |
| 9 | 12546702 | C | T | 31 | 33 | 0           | 0.144385027 | OPA1       |
| 3 | 31539842 | G | A | 16 | 6  | 0.216048287 | 0.508301223 | VIT        |
| 3 | 31539574 | T | C | 32 | 19 | 0.221907599 | 0.712722298 | VIT        |
| 2 | 31291843 | C | T | 30 | 24 | 0.264609324 | 0.04950495  | IGF2BP3    |
| 2 | 31291844 | C | T | 30 | 25 | 0.041190935 | 0.302180685 | IGF2BP3    |
| 2 | 31291910 | A | G | 30 | 24 | 0           | 0.302180685 | IGF2BP3    |
| 2 | 31291931 | G | A | 29 | 24 | 0.474355677 | 0.725166099 | IGF2BP3    |
| 2 | 31292042 | G | A | 29 | 23 | 0.260988811 | 0.632183908 | IGF2BP3    |
| 2 | 31292094 | C | T | 29 | 23 | 0           | 0.528023599 | IGF2BP3    |
| 2 | 31292233 | T | C | 30 | 21 | 0.59886167  | 0.725166099 | IGF2BP3    |
| 2 | 31292359 | A | G | 29 | 22 | 0.399202476 | 0.008092839 | IGF2BP3    |
| 2 | 31290728 | A | G | 30 | 23 | 0           | 0.124028388 | IGF2BP3    |
| 2 | 31290818 | C | T | 30 | 23 | 0.482820252 | 0.603851444 | IGF2BP3    |
| 2 | 31290904 | G | A | 31 | 24 | 0.528317897 | 0.837892604 | IGF2BP3    |
| 2 | 31290970 | A | C | 31 | 24 | 0.530306533 | 0.334916865 | IGF2BP3    |
| 2 | 31291039 | C | T | 31 | 24 | 0.018775131 | 0.240011176 | IGF2BP3    |
| 2 | 31290675 | C | T | 29 | 21 | 0.644305664 | 0.837892604 | IGF2BP3    |
| 2 | 31290672 | C | A | 29 | 21 | 0           | 0.124028388 | IGF2BP3    |
| 2 | 31290665 | A | C | 29 | 21 | 0           | 0.124028388 | IGF2BP3    |
| 3 | 54316468 | A | G | 24 | 14 | 0.561601858 | 0.822335025 | MAP3K5     |
| 3 | 54316446 | A | G | 27 | 14 | 0.595234855 | 0.822335025 | MAP3K5     |
| 3 | 54316289 | G | A | 26 | 14 | 0.584725202 | 0.837892604 | MAP3K5     |
| 3 | 54316272 | T | C | 26 | 14 | 0.584725202 | 0.822335025 | MAP3K5     |
| 3 | 54316232 | T | C | 26 | 14 | 0.584725202 | 0.73651192  | MAP3K5     |
| 3 | 54316242 | T | C | 25 | 14 | 0.251641276 | 0.44735208  | MAP3K5     |
| 3 | 54316350 | A | G | 26 | 14 | 0.140856889 | 0.607972207 | MAP3K5     |
| 3 | 54316094 | G | T | 24 | 14 | 0.162825692 | 0.124028388 | MAP3K5     |
| 3 | 54316098 | G | A | 24 | 14 | 0.162825692 | 0.124028388 | MAP3K5     |
| 1 | 63172968 | C | T | 30 | 23 | 0.528863839 | 0.725166099 | intergenic |
| 1 | 63172991 | A | G | 29 | 23 | 0.693279086 | 0.607972207 | intergenic |
| 1 | 63173097 | C | T | 20 | 23 | 0.457792875 | 0.4869873   | intergenic |
| 1 | 63173216 | C | T | 18 | 23 | 0.655093741 | 0.725166099 | intergenic |
| 1 | 63173227 | C | T | 18 | 23 | 0.687342389 | 0.725166099 | intergenic |
