# Supplementary material
Source: PubMed Central journal article supplement (PMC4856766)
Supplement: cr201644x15.pdf [file cr201644x15.pdf]

**Supplementary information, Table S6** Primers used for SNP validation in larger samples.

| <b>Primers</b>  | <b>sequences</b>        | <b>length(bp)</b> | <b>Tm(°C)</b> |
|-----------------|-------------------------|-------------------|---------------|
| Chr1.1-3F       | AAAGCAGCAGTGTTGTAAGC    | 20                | 54°C          |
| Chr1.1-3R       | CCTGTATGGAGTGGGAGATA    | 20                | 54°C          |
| Chr2-1F         | GAAATGGCAGTGAGAATT      | 18                | 54°C          |
| Chr2-1R         | GTGGGATATGTTGAGGAT      | 18                | 54°C          |
| Chr3-3F         | GGGTCAAAGAACAACACTC     | 18                | 54°C          |
| Chr3-3R         | GAGAAGACAAGGTAGGGA      | 18                | 54°C          |
| Chr5-1F         | GCATCTACCCTTAAACAA      | 18                | 54°C          |
| Chr5-1R         | GTACATGGCATTACAAT       | 18                | 54°C          |
| 2-ATP13A4-1-1F  | GGGTCTACAGGAAATGGA      | 18                | 54°C          |
| 2-ATP13A4-1-1R  | AAGGTAAGTGAATGGTGCT     | 18                | 54°C          |
| 3-RPGRIP1L-1-1F | GCTCTACCGCTCTGAATA      | 18                | 54°C          |
| 3-RPGRIP1L-1-1R | ATGGGTTTTAGGGATAAG      | 18                | 54°C          |
| 5-COL18A1-1-1F  | TGCTGGTTTTCCATTTGGTTG   | 20                | 54°C          |
| 5-COL18A1-1-1R  | ATGGCAAAGGCGGTGTCT      | 18                | 54°C          |
| 6-OPA1-1-3F     | CCTTGGTTCCTTCCGCTAT     | 19                | 54°C          |
| 6-OPA1-1-3R     | GGTTTAGTTTTCGCTTGTATCTT | 22                | 54°C          |
| 4-IGF2BP3-2-1F  | ATTCTCCCTTGAGCCTAC      | 18                | 54°C          |
| 4-IGF2BP3-2-1R  | CATCTTCTGATGCCATA       | 18                | 54°C          |
| 7-VIT-2-5F      | ATAAGCACTCGGCACAAA      | 18                | 54°C          |
| 7-VIT-2-5R      | AAACACCCAGGAAGATGA      | 18                | 54°C          |
| 4-IGF2BP3-1-1F  | ATACTCCACAACACCCAA      | 18                | 54°C          |
| 4-IGF2BP3-1-1R  | TAGCCTTTAAGACCTGCT      | 18                | 54°C          |
