# Supplementary material
Source: PubMed Central journal article supplement (PMC4856766)
Supplement: cr201644x17.pdf [file cr201644x17.pdf]

**Supplementary information, Table S8** Functional enrichment categories of PSGs detected by XP-EHH

| <b>Term</b> | <b>Term ID</b> | <b>P-value</b> | <b>Gene number</b> | <b>Description</b>                        |
|-------------|----------------|----------------|--------------------|-------------------------------------------|
| BP          | GO:0007218     | 0.05           | 6                  | neuropeptide signaling pathway            |
| hp          | HP:0000707     | 0.05           | 31                 | Abnormality of the nervous system         |
| hp          | HP:0002011     | 0.0487         | 30                 | Abnormality of the central nervous system |
| hp          | HP:0000608     | 0.0429         | 3                  | Macular degeneration                      |
| hp          | HP:0004298     | 0.0238         | 9                  | Abnormality of the abdominal wall         |
| hp          | HP:0001551     | 0.0456         | 6                  | Abnormality of the umbilicus              |
| hp          | HP:0100656     | 0.028          | 8                  | Thoracoabdominal wall defects             |
| hp          | HP:0010866     | 0.028          | 8                  | Abdominal wall defect                     |
| hp          | HP:0004299     | 0.026          | 8                  | Hernia of the abdominal wall              |
| hp          | HP:0001537     | 0.0397         | 6                  | Umbilical hernia                          |
| hp          | HP:0100543     | 0.0222         | 25                 | Cognitive impairment                      |
| ke          | KEGG:04144     | 0.05           | 6                  | Endocytosis                               |
