# Supplementary material
Source: PubMed Central journal article supplement (PMC4856766)
Supplement: cr201644x18.pdf [file cr201644x18.pdf]

**Supplementary information, Table S9** Functional enrichment categories of PSGs detected by  $F_{ST}$

| <b>Term</b> | <b>term ID</b> | <b>P-value</b> | <b>Gene number</b> | <b>Description</b>                       |
|-------------|----------------|----------------|--------------------|------------------------------------------|
| MF          | GO:0004767     | 5.00E-02       | 3                  | sphingomyelin phosphodiesterase activity |
| hp          | HP:0011282     | 5.00E-02       | 15                 | Abnormality of the hindbrain             |
| hp          | HP:0011283     | 5.00E-02       | 15                 | Abnormality of the metencephalon         |
| hp          | HP:0001317     | 5.00E-02       | 15                 | Abnormality of the cerebellum            |
| ke          | KEGG:04260     | 1.51E-02       | 2                  | Cardiac muscle contraction               |
| ke          | KEGG:00600     | 1.40E-02       | 2                  | Sphingolipid metabolism                  |
| ke          | KEGG:04060     | 3.13E-02       | 3                  | Cytokine-cytokine receptor interaction   |
| ke          | KEGG:04144     | 3.90E-02       | 3                  | Endocytosis                              |
| ke          | KEGG:00510     | 1.34E-02       | 2                  | N-Glycan biosynthesis                    |
| ke          | KEGG:04080     | 1.67E-02       | 5                  | Neuroactive ligand-receptor interaction  |
