# Supplementary material
Source: PubMed Central journal article supplement (PMC4856766)
Supplement: cr201644x20.pdf [file cr201644x20.pdf]

**Supplementary information, Table S11** Functional enrichment categories of PSGs detected by XP-CLR

| Term | Term ID    | P-value  | Gene number | Description                                                  |
|------|------------|----------|-------------|--------------------------------------------------------------|
| hp   | HP:0012232 | 1.05E-02 | 2           | Shortened QT interval                                        |
| hp   | HP:0001279 | 2.20E-03 | 4           | Syncope                                                      |
| hp   | HP:0001634 | 3.26E-02 | 3           | Mitral valve prolapse                                        |
| hp   | HP:0002297 | 1.05E-02 | 2           | Red hair                                                     |
| hp   | HP:0100678 | 2.13E-02 | 2           | Premature skin wrinkling                                     |
| hp   | HP:0002213 | 2.63E-02 | 4           | Fine hair                                                    |
| hp   | HP:0000591 | 2.63E-02 | 4           | Abnormality of the sclera                                    |
| hp   | HP:0000592 | 1.63E-02 | 4           | Blue sclerae                                                 |
| hp   | HP:0005115 | 1.03E-02 | 4           | Supraventricular arrhythmia                                  |
| hp   | HP:0001649 | 1.75E-02 | 5           | Tachycardia                                                  |
| hp   | HP:0004755 | 9.13E-03 | 4           | Supraventricular tachycardia                                 |
| hp   | HP:0001692 | 9.13E-03 | 4           | Primary atrial arrhythmia                                    |
| hp   | HP:0005110 | 6.99E-03 | 4           | Atrial fibrillation                                          |
| hp   | HP:0000639 | 1.09E-02 | 18          | Nystagmus                                                    |
| hp   | HP:0010647 | 1.81E-02 | 6           | Abnormal elasticity of skin                                  |
| hp   | HP:0008067 | 1.50E-02 | 5           | Abnormally lax or hyperextensible skin                       |
| hp   | HP:0000977 | 4.90E-03 | 3           | Soft skin                                                    |
| hp   | HP:0002047 | 3.54E-02 | 2           | Malignant hyperthermia                                       |
| hp   | HP:0000993 | 6.39E-03 | 2           | Molluscoid pseudotumors                                      |
| hp   | HP:0008056 | 1.18E-02 | 10          | Aplasia/Hypoplasia affecting the eye                         |
| hp   | HP:0008062 | 2.71E-02 | 5           | Aplasia/Hypoplasia affecting the anterior segment of the eye |
| hp   | HP:0008055 | 4.60E-02 | 4           | Aplasia/Hypoplasia affecting the uvea                        |
| hp   | HP:0008053 | 4.28E-02 | 4           | Aplasia/Hypoplasia of the iris                               |
| hp   | HP:0001788 | 2.13E-02 | 2           | Premature rupture of membranes                               |
| hp   | HP:0002445 | 3.54E-02 | 2           | Tetraplegia                                                  |
| hp   | HP:0001250 | 3.65E-02 | 23          | Seizures                                                     |
| hp   | HP:0000963 | 4.23E-03 | 5           | Thin skin                                                    |
| hp   | HP:0004329 | 2.66E-02 | 20          | Abnormality of the posterior segment of the eye              |
| hp   | HP:0001252 | 5.00E-02 | 19          | Muscular hypotonia                                           |
| hp   | HP:0100738 | 3.54E-02 | 2           | Abnormal eating behavior                                     |
| hp   | HP:0001103 | 2.04E-02 | 5           | Abnormality of the macula                                    |
| hp   | HP:0000493 | 1.55E-02 | 2           | Abnormality of the fovea                                     |
| hp   | HP:0008061 | 2.77E-03 | 3           | Aplasia/Hypoplasia affecting the retina                      |
| hp   | HP:0008059 | 1.97E-03 | 3           | Aplasia/Hypoplasia of the macula                             |
| hp   | HP:0008060 | 1.05E-02 | 2           | Aplasia/Hypoplasia of the fovea                              |
| hp   | HP:0007750 | 1.05E-02 | 2           | Hypoplasia of the fovea                                      |
| hp   | HP:0001030 | 4.36E-02 | 2           | Fragile skin                                                 |

|    |            |          |   |                                             |
|----|------------|----------|---|---------------------------------------------|
| hp | HP:0002085 | 4.36E-02 | 2 | Occipital encephalocele                     |
| ke | KEGG:04144 | 1.27E-02 | 7 | Endocytosis                                 |
| ke | KEGG:04020 | 1.79E-02 | 6 | Calcium signaling pathway                   |
| ke | KEGG:04270 | 6.05E-03 | 5 | Vascular smooth muscle contraction          |
| ke | KEGG:00230 | 3.49E-02 | 5 | Purine metabolism                           |
| ke | KEGG:04916 | 4.73E-02 | 3 | Melanogenesis                               |
| ke | KEGG:00565 | 2.88E-02 | 2 | Ether lipid metabolism                      |
| ke | KEGG:00520 | 1.45E-02 | 3 | Amino sugar and nucleotide sugar metabolism |
| ke | KEGG:00650 | 1.76E-02 | 2 | Butanoate metabolism                        |
| ke | KEGG:04060 | 4.09E-02 | 5 | Cytokine-cytokine receptor interaction      |
| ke | KEGG:04350 | 2.81E-03 | 5 | TGF-beta signaling pathway                  |
| ke | KEGG:00410 | 1.63E-02 | 2 | beta-Alanine metabolism                     |
| ke | KEGG:04260 | 1.69E-02 | 3 | Cardiac muscle contraction                  |
| ke | KEGG:04010 | 4.69E-02 | 6 | MAPK signaling pathway                      |
| ke | KEGG:00280 | 3.93E-02 | 2 | Valine, leucine and isoleucine degradation  |
| ke | KEGG:04510 | 3.22E-02 | 6 | Focal adhesion                              |
| ke | KEGG:04110 | 3.52E-02 | 4 | Cell cycle                                  |
| ke | KEGG:04210 | 2.89E-02 | 3 | Apoptosis                                   |
| ke | KEGG:00983 | 2.16E-02 | 2 | Drug metabolism - other enzymes             |
