# Supplementary material
Source: PubMed Central journal article supplement (PMC4856766)
Supplement: cr201644x21.pdf [file cr201644x21.pdf]

**Supplementary information, Table S12** Description for 36 PSGs detected by combining  $F_{ST}$ ,  $P_i$ , XP-EHH and XP-CLR

| <b>Ensemble GeneID</b> | <b>Gene name</b> | <b>Discription</b>                                         |
|------------------------|------------------|------------------------------------------------------------|
| ENSGALG00000002789     | MAP2             | Microtubule-associated protein                             |
| ENSGALG00000002828     | UNC80            | Uncharacterized protein                                    |
| ENSGALG00000003591     | FTO              | protein fto                                                |
| ENSGALG00000003602     | RPGRIP1L         | RPGRIP1-like                                               |
| ENSGALG00000003620     | AKTIP            | AKT-interacting protein                                    |
| ENSGALG00000003663     | RBL2             | retinoblastoma-like protein 2                              |
| ENSGALG00000003719     | CHD9             | chromodomain helicase DNA binding protein 9                |
| ENSGALG00000004322     | N/A              | Uncharacterized protein                                    |
| ENSGALG00000004338     | COL18A1          | collagen, type XVIII, alpha 1 precursor                    |
| ENSGALG00000007150     | OPA1             | dynamin-like 120 kDa protein, mitochondrial precursor      |
| ENSGALG00000007179     | ATP13A5          | ATPase type 13A5                                           |
| ENSGALG00000007193     | HRASLS           | Uncharacterized protein                                    |
| ENSGALG00000007208     | N/A              | N/A                                                        |
| ENSGALG00000008164     | ADAMTS7          | Uncharacterized protein                                    |
| ENSGALG00000008526     | BRD1             | bromodomain-containing protein 1                           |
| ENSGALG00000008539     | ALG12            | alpha-1,6-mannosyltransferase ALG12 precursor              |
| ENSGALG00000008547     | ZBED4            | zinc finger BED domain-containing protein 4                |
| ENSGALG00000008551     | CRELD2           | cysteine-rich with EGF-like domain protein 2 precursor     |
| ENSGALG00000009925     | MTA3             | metastasis associated 1 family, member 3                   |
| ENSGALG00000009926     | HAAO             | 3-hydroxyanthranilate 3,4-dioxygenase                      |
| ENSGALG00000010391     | MMRN1            | multimerin 1                                               |
| ENSGALG00000010572     | TSHR             | thyrotropin receptor isoform 1 precursor                   |
| ENSGALG00000010949     | GPNMB            | glycoprotein (transmembrane) nmb                           |
| ENSGALG00000010954     | MALSU1           | mitochondrial assembly of ribosomal large subunit 1        |
| ENSGALG00000010961     | IGF2BP3          | Insulin-like growth factor 2 mRNA-binding protein 3        |
| ENSGALG00000013521     | TBC1D1           | TBC1 (tre-2/USP6, BUB2, cdc16) domain family, member 1     |
| ENSGALG00000013576     | MEL1A            | Melatonin receptor type 1A                                 |
| ENSGALG00000014421     | LCORL            | Ligand-dependent nuclear receptor corepressor-like protein |
| ENSGALG00000014425     | NCAPG            | non-SMC condensin I complex, subunit G                     |
| ENSGALG00000016157     | UMODL1           | Uncharacterized protein                                    |
| ENSGALG00000016183     | EYS              | Uncharacterized protein                                    |
| ENSGALG00000016460     | NBAS             | neuroblastoma amplified sequence                           |
| ENSGALG00000020827     | ATP13A4          | probable cation-transporting ATPase 13A4                   |
| ENSGALG00000022827     | SDR16C5          | short chain dehydrogenase/reductase family 16C, member 5   |
| ENSGALG00000023731     | N/A              | N/A                                                        |
| ENSGALG00000023742     | N/A              | N/A                                                        |
