# Supplementary material
Source: PubMed Central journal article supplement (PMC4856766)
Supplement: cr201644x22.pdf [file cr201644x22.pdf]

**Supplementary information, Table S13** Functional enrichment categories of 36 PSGs detected shared by  $F_{ST}$ ,  $P_i$ , XP-CLR and XP-EHH

| Term | Term ID    | P-value  | Gene number | Description                                             |
|------|------------|----------|-------------|---------------------------------------------------------|
| hp   | HP:0000006 | 5.00E-02 | 2           | Autosomal dominant inheritance                          |
| hp   | HP:0000005 | 4.91E-02 | 6           | Mode of inheritance                                     |
| hp   | HP:0000951 | 4.85E-02 | 2           | Abnormality of the skin                                 |
| hp   | HP:0000079 | 4.28E-02 | 2           | Abnormality of the urinary system                       |
| hp   | HP:0011354 | 4.13E-02 | 2           | Generalized abnormality of skin                         |
| hp   | HP:0001574 | 4.02E-02 | 3           | Abnormality of the integument                           |
| hp   | HP:0100022 | 3.66E-02 | 2           | Abnormality of movement                                 |
| hp   | HP:0002814 | 3.61E-02 | 2           | Abnormality of the lower limb                           |
| hp   | HP:0000364 | 3.45E-02 | 2           | Hearing abnormality                                     |
| hp   | HP:0000365 | 3.38E-02 | 2           | Hearing impairment                                      |
| hp   | HP:0000478 | 3.38E-02 | 4           | Abnormality of the eye                                  |
| hp   | HP:0012243 | 3.30E-02 | 2           | Abnormal genital system morphology                      |
| hp   | HP:0002817 | 3.29E-02 | 2           | Abnormality of the upper limb                           |
| hp   | HP:0001249 | 3.25E-02 | 2           | Intellectual disability                                 |
| hp   | HP:0012759 | 3.24E-02 | 3           | Neurodevelopmental abnormality                          |
| hp   | HP:0000002 | 3.20E-02 | 2           | Abnormality of body height                              |
| hp   | HP:0011024 | 3.16E-02 | 2           | Abnormality of the gastrointestinal tract               |
| hp   | HP:0000240 | 3.15E-02 | 2           | Abnormality of skull size                               |
| hp   | HP:0011805 | 3.13E-02 | 2           | Abnormality of muscle morphology                        |
| hp   | HP:0004323 | 3.11E-02 | 2           | Abnormality of body weight                              |
| hp   | HP:0002493 | 3.07E-02 | 2           | Upper motor neuron dysfunction                          |
| hp   | HP:0000598 | 3.07E-02 | 3           | Abnormality of the ear                                  |
| hp   | HP:0002012 | 3.05E-02 | 3           | Abnormality of the abdominal organs                     |
| hp   | HP:0004328 | 3.03E-02 | 2           | Abnormality of the anterior segment of the eye          |
| hp   | HP:0001155 | 3.02E-02 | 2           | Abnormality of the hand                                 |
| hp   | HP:0004322 | 2.99E-02 | 2           | Short stature                                           |
| hp   | HP:0010935 | 2.97E-02 | 2           | Abnormality of the upper urinary tract                  |
| hp   | HP:0002597 | 2.87E-02 | 2           | Abnormality of the vasculature                          |
| hp   | HP:0007364 | 2.87E-02 | 2           | Aplasia/Hypoplasia of the cerebrum                      |
| hp   | HP:0040064 | 2.85E-02 | 3           | Abnormality of limbs                                    |
| hp   | HP:0000818 | 2.84E-02 | 2           | Abnormality of the endocrine system                     |
| hp   | HP:0012718 | 2.78E-02 | 2           | Morphological abnormality of the gastrointestinal tract |
| hp   | HP:0001392 | 2.78E-02 | 2           | Abnormality of the liver                                |
| hp   | HP:0001760 | 2.77E-02 | 2           | Abnormality of the foot                                 |
| hp   | HP:0011458 | 2.71E-02 | 2           | Abdominal symptom                                       |
| hp   | HP:0001263 | 2.66E-02 | 2           | Global developmental delay                              |

|    |            |          |   |                                                 |
|----|------------|----------|---|-------------------------------------------------|
| hp | HP:0003674 | 2.62E-02 | 2 | Onset                                           |
| hp | HP:0000811 | 2.49E-02 | 2 | Abnormal external genitalia                     |
| hp | HP:0010461 | 2.47E-02 | 2 | Abnormality of the male genitalia               |
| hp | HP:0000032 | 2.40E-02 | 2 | Abnormality of male external genitalia          |
| hp | HP:0009115 | 2.35E-02 | 2 | Aplasia/hypoplasia involving the skeleton       |
| hp | HP:0001595 | 2.32E-02 | 2 | Abnormality of the hair                         |
| hp | HP:0001438 | 2.29E-02 | 4 | Abnormality of the abdomen                      |
| hp | HP:0011025 | 2.26E-02 | 2 | Abnormality of cardiovascular system physiology |
| hp | HP:0000492 | 2.23E-02 | 2 | Abnormality of the eyelid                       |
| hp | HP:0040195 | 2.16E-02 | 2 | Decreased head circumference                    |
| hp | HP:0000252 | 2.16E-02 | 2 | Microcephaly                                    |
| hp | HP:0000007 | 2.11E-02 | 5 | Autosomal recessive inheritance                 |
| hp | HP:0004325 | 2.09E-02 | 2 | Decreased body weight                           |
| hp | HP:0100547 | 2.09E-02 | 3 | Abnormality of forebrain morphology             |
| hp | HP:0002664 | 2.08E-02 | 2 | Neoplasm                                        |
| hp | HP:0002060 | 2.08E-02 | 3 | Abnormality of the cerebrum                     |
| hp | HP:0000707 | 2.07E-02 | 6 | Abnormality of the nervous system               |
| hp | HP:0000174 | 2.04E-02 | 2 | Abnormality of the palate                       |
| hp | HP:0000163 | 2.03E-02 | 3 | Abnormality of the oral cavity                  |
| hp | HP:0000315 | 2.02E-02 | 2 | Abnormality of the orbital region               |
| hp | HP:0001250 | 2.02E-02 | 3 | Seizures                                        |
| hp | HP:0001324 | 2.01E-02 | 2 | Muscle weakness                                 |
| hp | HP:0000119 | 1.99E-02 | 4 | Abnormality of the genitourinary system         |
| hp | HP:0000359 | 1.98E-02 | 2 | Abnormality of the inner ear                    |
| hp | HP:0001626 | 1.98E-02 | 4 | Abnormality of the cardiovascular system        |
| hp | HP:0011389 | 1.96E-02 | 2 | Functional abnormality of the inner ear         |
| hp | HP:0001507 | 1.95E-02 | 4 | Growth abnormality                              |
| hp | HP:0000035 | 1.92E-02 | 2 | Abnormality of the testis                       |
| hp | HP:0002715 | 1.89E-02 | 3 | Abnormality of the immune system                |
| hp | HP:0000159 | 1.88E-02 | 2 | Abnormality of the lip                          |
| hp | HP:0000479 | 1.87E-02 | 2 | Abnormality of the retina                       |
| hp | HP:0000924 | 1.87E-02 | 5 | Abnormality of the skeletal system              |
| hp | HP:0000422 | 1.86E-02 | 2 | Abnormality of the nasal bridge                 |
| hp | HP:0012372 | 1.85E-02 | 4 | Abnormal eye morphology                         |
| hp | HP:0000407 | 1.84E-02 | 2 | Sensorineural hearing impairment                |
| hp | HP:0000152 | 1.79E-02 | 5 | Abnormality of head or neck                     |
| hp | HP:0005105 | 1.78E-02 | 2 | Abnormal nasal morphology                       |
| hp | HP:0012374 | 1.78E-02 | 4 | Abnormality of the globe                        |
| hp | HP:0012373 | 1.78E-02 | 4 | Abnormal eye physiology                         |
| hp | HP:0000277 | 1.75E-02 | 2 | Abnormality of the mandible                     |
| hp | HP:0000517 | 1.73E-02 | 2 | Abnormality of the lens                         |
| hp | HP:0000366 | 1.72E-02 | 3 | Abnormality of the nose                         |

|    |            |          |   |                                                         |
|----|------------|----------|---|---------------------------------------------------------|
| hp | HP:0000234 | 1.71E-02 | 5 | Abnormality of the head                                 |
| hp | HP:0000078 | 1.70E-02 | 3 | Abnormality of the genital system                       |
| hp | HP:0002977 | 1.68E-02 | 3 | Aplasia/Hypoplasia involving the central nervous system |
| hp | HP:0011844 | 1.67E-02 | 3 | Abnormal appendicular skeleton morphology               |
| hp | HP:0000290 | 1.65E-02 | 2 | Abnormality of the forehead                             |
| hp | HP:0000518 | 1.64E-02 | 2 | Cataract                                                |
| hp | HP:0001276 | 1.62E-02 | 2 | Hypertonia                                              |
| hp | HP:0003549 | 1.61E-02 | 3 | Abnormality of connective tissue                        |
| hp | HP:0010938 | 1.59E-02 | 2 | Abnormality of the external nose                        |
| hp | HP:0100886 | 1.59E-02 | 2 | Abnormality of globe location                           |
| hp | HP:0000284 | 1.58E-02 | 3 | Abnormality of the ocular region                        |
| hp | HP:0012758 | 1.58E-02 | 3 | Neurodevelopmental delay                                |
| hp | HP:0011446 | 1.57E-02 | 4 | Abnormality of higher mental function                   |
| hp | HP:0011842 | 1.57E-02 | 5 | Abnormality of skeletal morphology                      |
| hp | HP:0040068 | 1.56E-02 | 3 | Abnormality of limb bone                                |
| hp | HP:0012638 | 1.45E-02 | 6 | Abnormality of nervous system physiology                |
| hp | HP:0001627 | 1.42E-02 | 3 | Abnormality of cardiac morphology                       |
| hp | HP:0002813 | 1.40E-02 | 3 | Abnormality of limb bone morphology                     |
| hp | HP:0012639 | 1.36E-02 | 5 | Abnormality of nervous system morphology                |
| hp | HP:0002564 | 1.32E-02 | 3 | Malformation of the heart and great vessels             |
| hp | HP:0000481 | 1.31E-02 | 2 | Abnormality of the cornea                               |
| ke | KEGG:01100 | 1.29E-02 | 2 | Metabolic pathways                                      |
| hp | HP:0011138 | 1.25E-02 | 3 | Abnormality of skin adnexa                              |
| hp | HP:0000177 | 1.24E-02 | 2 | Abnormality of upper lip                                |
| hp | HP:0100763 | 1.19E-02 | 2 | Abnormality of the lymphatic system                     |
| hp | HP:0000028 | 1.16E-02 | 2 | Cryptorchidism                                          |
| hp | HP:0000925 | 1.16E-02 | 3 | Abnormality of the vertebral column                     |
| hp | HP:0000271 | 1.11E-02 | 5 | Abnormality of the face                                 |
| hp | HP:0000202 | 1.08E-02 | 2 | Oral cleft                                              |
| hp | HP:0000153 | 1.08E-02 | 4 | Abnormality of the mouth                                |
| hp | HP:0000508 | 1.06E-02 | 2 | Ptosis                                                  |
| hp | HP:0000316 | 1.03E-02 | 2 | Hypertelorism                                           |
| hp | HP:0003812 | 1.03E-02 | 2 | Phenotypic variability                                  |
| hp | HP:0001780 | 1.01E-02 | 2 | Abnormality of toe                                      |
| hp | HP:0011297 | 1.01E-02 | 3 | Abnormality of digit                                    |
| hp | HP:0000429 | 9.59E-03 | 2 | Abnormality of the nasal alae                           |
| hp | HP:0000606 | 9.32E-03 | 3 | Abnormality of the periorbital region                   |
| hp | HP:0010936 | 9.20E-03 | 2 | Abnormality of the lower urinary tract                  |
| hp | HP:0001197 | 9.20E-03 | 2 | Abnormality of prenatal development or birth            |
| hp | HP:0002011 | 9.20E-03 | 5 | Morphological abnormality of the central nervous system |
| hp | HP:0011442 | 9.02E-03 | 4 | Abnormality of central motor function                   |

|    |            |          |   |                                                 |
|----|------------|----------|---|-------------------------------------------------|
| hp | HP:0100737 | 8.98E-03 | 2 | Abnormality of the hard palate                  |
| hp | HP:0000175 | 8.87E-03 | 2 | Cleft palate                                    |
| hp | HP:0011843 | 8.65E-03 | 2 | Abnormality of skeletal physiology              |
| hp | HP:0000464 | 8.59E-03 | 2 | Abnormality of the neck                         |
| hp | HP:0011821 | 8.30E-03 | 3 | Abnormality of facial skeleton                  |
| hp | HP:0005288 | 8.16E-03 | 2 | Abnormality of the nares                        |
| hp | HP:0012547 | 7.80E-03 | 3 | Abnormal involuntary eye movements              |
| hp | HP:0000639 | 7.72E-03 | 3 | Nystagmus                                       |
| hp | HP:0000463 | 7.69E-03 | 2 | Anteverted nares                                |
| hp | HP:0009121 | 7.52E-03 | 5 | Abnormal axial skeleton morphology              |
| hp | HP:0011927 | 7.32E-03 | 2 | Short digit                                     |
| hp | HP:0000309 | 7.27E-03 | 2 | Abnormality of the midface                      |
| hp | HP:0012823 | 6.90E-03 | 4 | Clinical modifier                               |
| hp | HP:0012443 | 6.51E-03 | 5 | Abnormality of brain morphology                 |
| hp | HP:0000534 | 6.46E-03 | 2 | Abnormality of the eyebrow                      |
| hp | HP:0001510 | 6.38E-03 | 4 | Growth delay                                    |
| hp | HP:0003593 | 6.36E-03 | 2 | Infantile onset                                 |
| hp | HP:0000539 | 6.07E-03 | 2 | Abnormality of refraction                       |
| hp | HP:0100543 | 5.95E-03 | 4 | Cognitive impairment                            |
| hp | HP:0000496 | 5.37E-03 | 4 | Abnormality of eye movement                     |
| hp | HP:0000286 | 5.26E-03 | 2 | Epicanthus                                      |
| hp | HP:0011443 | 5.02E-03 | 3 | Abnormality of coordination                     |
| hp | HP:0001252 | 4.99E-03 | 4 | Muscular hypotonia                              |
| hp | HP:0008056 | 4.94E-03 | 2 | Aplasia/Hypoplasia affecting the eye            |
| hp | HP:0000505 | 4.71E-03 | 3 | Visual impairment                               |
| hp | HP:0001156 | 4.32E-03 | 2 | Brachydactyly syndrome                          |
| hp | HP:0003319 | 3.90E-03 | 2 | Abnormality of the cervical spine               |
| hp | HP:0000545 | 3.81E-03 | 2 | Myopia                                          |
| hp | HP:0000929 | 3.48E-03 | 5 | Abnormality of the skull                        |
| hp | HP:0000587 | 3.47E-03 | 3 | Abnormality of the optic nerve                  |
| hp | HP:0000470 | 3.33E-03 | 2 | Short neck                                      |
| hp | HP:0007957 | 3.25E-03 | 2 | Corneal opacity                                 |
| hp | HP:0002648 | 3.17E-03 | 3 | Abnormality of calvarial morphology             |
| hp | HP:0000927 | 3.14E-03 | 2 | Abnormality of skeletal maturation              |
| hp | HP:0004329 | 2.90E-03 | 4 | Abnormality of the posterior segment of the eye |
| hp | HP:0001098 | 2.87E-03 | 4 | Abnormality of the fundus                       |
| hp | HP:0012795 | 2.86E-03 | 3 | Abnormality of the optic disc                   |
| hp | HP:0003011 | 2.86E-03 | 6 | Abnormality of the musculature                  |
| hp | HP:0000864 | 2.77E-03 | 2 | Abnormality of the hypothalamus-pituitary axis  |
| hp | HP:0001551 | 2.38E-03 | 2 | Abnormality of the umbilicus                    |
| hp | HP:0001537 | 2.28E-03 | 2 | Umbilical hernia                                |

|    |            |          |   |                                               |
|----|------------|----------|---|-----------------------------------------------|
| hp | HP:0003808 | 2.28E-03 | 5 | Abnormal muscle tone                          |
| hp | HP:0000648 | 2.26E-03 | 3 | Optic atrophy                                 |
| hp | HP:0001251 | 2.22E-03 | 3 | Ataxia                                        |
| hp | HP:0002118 | 2.09E-03 | 3 | Abnormality of the cerebral ventricles        |
| hp | HP:0011603 | 1.98E-03 | 2 | Congenital malformation of the great arteries |
| hp | HP:0002438 | 1.95E-03 | 2 | Cerebellar malformation                       |
| hp | HP:0011282 | 1.88E-03 | 4 | Abnormality of hindbrain morphology           |
| hp | HP:0011283 | 1.88E-03 | 4 | Abnormality of the metencephalon              |
| hp | HP:0001317 | 1.87E-03 | 4 | Abnormality of the cerebellum                 |
| hp | HP:0000280 | 1.83E-03 | 2 | Coarse facial features                        |
| hp | HP:0001643 | 1.80E-03 | 2 | Patent ductus arteriosus                      |
| hp | HP:0002538 | 1.68E-03 | 2 | Abnormality of the cerebral cortex            |
| hp | HP:0000504 | 1.58E-03 | 4 | Abnormality of vision                         |
| hp | HP:0002536 | 1.42E-03 | 2 | Abnormal cortical gyration                    |
| hp | HP:0100729 | 1.37E-03 | 2 | Large face                                    |
| hp | HP:0011804 | 1.36E-03 | 6 | Abnormality of muscle physiology              |
| hp | HP:0002334 | 1.34E-03 | 2 | Abnormality of the cerebellar vermis          |
| hp | HP:0006817 | 1.18E-03 | 2 | Aplasia/Hypoplasia of the cerebellar vermis   |
| hp | HP:0007663 | 1.13E-03 | 2 | Reduced visual acuity                         |
| ke | KEGG:04080 | 1.08E-03 | 2 | Neuroactive ligand-receptor interaction       |
| hp | HP:0000276 | 1.06E-03 | 2 | Long face                                     |
| hp | HP:0001320 | 1.04E-03 | 2 | Cerebellar vermis hypoplasia                  |
| hp | HP:0004298 | 1.00E-03 | 3 | Abnormality of the abdominal wall             |
| hp | HP:0002921 | 1.00E-03 | 3 | Abnormality of the cerebrospinal fluid        |
| hp | HP:0010576 | 9.65E-04 | 2 | Intracranial cystic lesion                    |
| hp | HP:0100790 | 9.00E-04 | 3 | Hernia                                        |
| hp | HP:0002693 | 8.97E-04 | 2 | Abnormality of the skull base                 |
| hp | HP:0002683 | 8.21E-04 | 4 | Abnormality of the calvaria                   |
| hp | HP:0000932 | 7.67E-04 | 2 | Abnormality of the posterior cranial fossa    |
| hp | HP:0011815 | 7.67E-04 | 2 | Cephalocele                                   |
| hp | HP:0002084 | 7.67E-04 | 2 | Encephalocele                                 |
| hp | HP:0002119 | 7.55E-04 | 3 | Ventriculomegaly                              |
| hp | HP:0001999 | 7.54E-04 | 4 | Abnormal facial shape                         |
| hp | HP:0002350 | 7.26E-04 | 2 | Cerebellar cyst                               |
| hp | HP:0010950 | 7.06E-04 | 2 | Abnormality of the fourth ventricle           |
| hp | HP:0002198 | 7.06E-04 | 2 | Dilated fourth ventricle                      |
| hp | HP:0000341 | 6.47E-04 | 2 | Narrow forehead                               |
| hp | HP:0010866 | 6.33E-04 | 3 | Abdominal wall defect                         |
| hp | HP:0005445 | 6.28E-04 | 2 | Widened posterior fossa                       |
| hp | HP:0004299 | 6.16E-04 | 3 | Hernia of the abdominal wall                  |
| hp | HP:0001305 | 6.09E-04 | 2 | Dandy-Walker malformation                     |
| hp | HP:0004307 | 5.19E-04 | 2 | Abnormal anatomic location of the heart       |
| hp | HP:0001651 | 5.19E-04 | 2 | Dextrocardia                                  |

|    |            |          |   |                                                      |
|----|------------|----------|---|------------------------------------------------------|
| hp | HP:0000572 | 5.19E-04 | 2 | Visual loss                                          |
| hp | HP:0000549 | 4.81E-04 | 4 | Abnormal conjugate eye movement                      |
| hp | HP:0000486 | 4.72E-04 | 4 | Strabismus                                           |
| hp | HP:0011534 | 4.51E-04 | 2 | Abnormal spatial orientation of the cardiac segments |
| hp | HP:0001696 | 4.51E-04 | 2 | Situs inversus totalis                               |
| hp | HP:0000238 | 4.28E-04 | 3 | Hydrocephalus                                        |
| hp | HP:0002269 | 3.75E-04 | 3 | Abnormality of neuronal migration                    |
| hp | HP:0000157 | 2.70E-04 | 3 | Abnormality of the tongue                            |
| hp | HP:0002085 | 1.82E-05 | 2 | Occipital encephalocele                              |
