# Supplementary material
Source: PubMed Central journal article supplement (PMC4856766)
Supplement: cr201644x23.pdf [file cr201644x23.pdf]

**Supplementary information, Table S14** Functional enrichment categories of PSGs reported by Rubin and colleagues in all domestic lines(AD). Categories associated with vision-related function are marked in green.

| Term | Term ID    | P-value  | Gene number | Descriptions                                 |
|------|------------|----------|-------------|----------------------------------------------|
| ke   | KEGG:04621 | 2.59E-02 | 3           | NOD-like receptor signaling pathway          |
| ke   | KEGG:00770 | 5.00E-02 | 2           | Pantothenate and CoA biosynthesis            |
| hp   | HP:0410008 | 7.77E-03 | 4           | Abnormality of the peripheral nervous system |
| hp   | HP:0200013 | 3.59E-03 | 2           | Neoplasm of fatty tissue                     |
| hp   | HP:0200007 | 4.35E-02 | 2           | Abnormal size of the palpebral fissures      |
| hp   | HP:0100886 | 3.77E-02 | 7           | Abnormality of globe location                |
| hp   | HP:0100851 | 4.28E-02 | 4           | Abnormal emotion/affect behavior             |
| hp   | HP:0100790 | 1.22E-02 | 6           | Hernia                                       |
| hp   | HP:0100755 | 1.88E-03 | 3           | Abnormality of salivation                    |
| hp   | HP:0100729 | 4.35E-02 | 2           | Large face                                   |
| hp   | HP:0100691 | 2.26E-02 | 2           | Abnormality of the curvature of the cornea   |
| hp   | HP:0100689 | 3.41E-02 | 2           | Decreased corneal thickness                  |
| hp   | HP:0100659 | 4.46E-02 | 2           | Abnormality of the cerebral vasculature      |
| hp   | HP:0100615 | 1.43E-02 | 2           | Ovarian neoplasm                             |
| hp   | HP:0100589 | 7.64E-03 | 3           | Urogenital fistula                           |
| hp   | HP:0100547 | 1.36E-02 | 16          | Abnormality of forebrain morphology          |
| hp   | HP:0100543 | 3.66E-02 | 13          | Cognitive impairment                         |
| hp   | HP:0100540 | 2.65E-03 | 2           | Palpebral edema                              |
| hp   | HP:0100539 | 4.29E-03 | 2           | Periorbital edema                            |
| hp   | HP:0100335 | 7.49E-03 | 2           | Non-midline cleft lip                        |
| hp   | HP:0100259 | 3.63E-02 | 2           | Postaxial polydactyly                        |
| hp   | HP:0100022 | 1.87E-02 | 14          | Abnormality of movement                      |
| hp   | HP:0040195 | 2.92E-02 | 9           | Decreased head circumference                 |
| hp   | HP:0040075 | 2.37E-02 | 2           | Hypopituitarism                              |
| hp   | HP:0030311 | 3.63E-02 | 2           | Lower extremity joint dislocation            |
| hp   | HP:0030182 | 3.59E-03 | 2           | Tetraplegia/tetraparesis                     |
| hp   | HP:0012874 | 2.49E-02 | 2           | Abnormal male reproductive system physiology |
| hp   | HP:0012823 | 3.13E-02 | 14          | Clinical modifier                            |
| hp   | HP:0012758 | 3.81E-02 | 12          | Neurodevelopmental delay                     |
| hp   | HP:0012640 | 6.63E-03 | 2           | Abnormality of intracranial pressure         |
| hp   | HP:0012639 | 4.18E-02 | 22          | Abnormality of nervous system morphology     |
| hp   | HP:0012575 | 4.24E-02 | 2           | Abnormality of the nephron                   |
| hp   | HP:0012547 | 1.44E-02 | 11          | Abnormal involuntary eye movements           |
| hp   | HP:0012531 | 2.24E-02 | 3           | Pain                                         |
| hp   | HP:0012503 | 1.76E-02 | 3           | Abnormality of the pituitary gland           |
| hp   | HP:0012443 | 1.47E-02 | 21          | Abnormality of brain morphology              |
| hp   | HP:0012387 | 6.63E-03 | 2           | Bronchitis                                   |

|    |            |          |    |                                                 |
|----|------------|----------|----|-------------------------------------------------|
| hp | HP:0012331 | 1.09E-02 | 3  | Abnormal autonomic nervous system morphology    |
| hp | HP:0012210 | 4.76E-02 | 7  | Abnormal renal morphology                       |
| hp | HP:0012130 | 4.81E-02 | 5  | Abnormality of cells of the erythroid lineage   |
| hp | HP:0012103 | 1.98E-02 | 2  | Abnormality of the mitochondrion                |
| hp | HP:0012031 | 3.59E-03 | 2  | Lipomatous tumor                                |
| hp | HP:0011815 | 9.07E-03 | 3  | Cephalocele                                     |
| hp | HP:0011804 | 4.76E-02 | 18 | Abnormality of muscle physiology                |
| hp | HP:0011799 | 1.59E-02 | 4  | Abnormality of facial soft tissue               |
| hp | HP:0011772 | 1.98E-02 | 2  | Abnormality of thyroid morphology               |
| hp | HP:0011747 | 1.65E-02 | 3  | Abnormality of the anterior pituitary           |
| hp | HP:0011733 | 2.72E-02 | 2  | Abnormality of adrenal physiology               |
| hp | HP:0011732 | 9.31E-03 | 2  | Abnormality of adrenal morphology               |
| hp | HP:0011486 | 3.52E-02 | 2  | Abnormality of corneal thickness                |
| hp | HP:0011458 | 5.00E-02 | 9  | Abdominal symptom                               |
| hp | HP:0011446 | 1.29E-02 | 20 | Abnormality of higher mental function           |
| hp | HP:0011443 | 1.06E-02 | 10 | Abnormality of coordination                     |
| hp | HP:0011442 | 2.19E-02 | 16 | Abnormality of central motor function           |
| hp | HP:0011355 | 4.83E-02 | 6  | Localized skin lesion                           |
| hp | HP:0011338 | 3.69E-02 | 2  | Abnormality of mouth shape                      |
| hp | HP:0011334 | 9.35E-04 | 2  | Facial shape deformation                        |
| hp | HP:0011329 | 3.37E-02 | 3  | Abnormality of cranial sutures                  |
| hp | HP:0011328 | 1.06E-02 | 3  | Abnormality of fontanelles                      |
| hp | HP:0011283 | 2.97E-02 | 10 | Abnormality of the metencephalon                |
| hp | HP:0011282 | 2.97E-02 | 10 | Abnormality of hindbrain morphology             |
| hp | HP:0011025 | 3.29E-02 | 9  | Abnormality of cardiovascular system physiology |
| hp | HP:0011017 | 4.03E-02 | 4  | Abnormality of cell physiology                  |
| hp | HP:0011014 | 4.49E-02 | 5  | Abnormal glucose homeostasis                    |
| hp | HP:0010950 | 2.78E-02 | 2  | Abnormality of the fourth ventricle             |
| hp | HP:0010866 | 7.61E-03 | 6  | Abdominal wall defect                           |
| hp | HP:0010864 | 1.87E-02 | 2  | Intellectual disability, severe                 |
| hp | HP:0010787 | 2.78E-02 | 2  | Genital neoplasm                                |
| hp | HP:0010785 | 1.98E-02 | 2  | Gonadal neoplasm                                |
| hp | HP:0010647 | 4.24E-02 | 2  | Abnormal elasticity of skin                     |
| hp | HP:0010576 | 1.19E-02 | 3  | Intracranial cystic lesion                      |
| hp | HP:0010460 | 2.78E-02 | 7  | Abnormality of the female genitalia             |
| hp | HP:0010161 | 1.81E-02 | 2  | Abnormality of the phalanges of the toes        |
| hp | HP:0009774 | 3.52E-02 | 2  | Triangular shaped phalanges of the hand         |
| hp | HP:0009602 | 3.24E-02 | 2  | Abnormality of thumb phalanx                    |
| hp | HP:0009136 | 2.95E-02 | 2  | Duplication involving bones of the feet         |
| hp | HP:0009124 | 1.80E-02 | 3  | Abnormality of adipose tissue                   |
| hp | HP:0009121 | 1.98E-02 | 21 | Abnormal axial skeleton morphology              |
| hp | HP:0009118 | 4.19E-02 | 6  | Aplasia/Hypoplasia of the mandible              |
| hp | HP:0009116 | 4.34E-02 | 6  | Aplasia/Hypoplasia involving bones of the skull |

|    |            |          |    |                                                 |
|----|------------|----------|----|-------------------------------------------------|
| hp | HP:0008872 | 4.46E-02 | 4  | Feeding difficulties in infancy                 |
| hp | HP:0008678 | 3.20E-02 | 3  | Renal hypoplasia/aplasia                        |
| hp | HP:0008572 | 2.26E-02 | 2  | External ear malformation                       |
| hp | HP:0008316 | 3.26E-03 | 2  | Abnormal mitochondria in muscle tissue          |
| hp | HP:0008067 | 2.37E-02 | 2  | Abnormally lax or hyperextensible skin          |
| hp | HP:0008056 | 3.35E-02 | 4  | Aplasia/Hypoplasia affecting the eye            |
| hp | HP:0008047 | 2.36E-02 | 3  | Abnormality of the vasculature of the eye       |
| hp | HP:0008046 | 2.04E-02 | 3  | Abnormality of the retinal vasculature          |
| hp | HP:0007379 | 4.19E-02 | 2  | Neoplasm of the genitourinary tract             |
| hp | HP:0007364 | 1.67E-02 | 12 | Aplasia/Hypoplasia of the cerebrum              |
| hp | HP:0007360 | 1.65E-02 | 5  | Aplasia/Hypoplasia of the cerebellum            |
| hp | HP:0007256 | 4.48E-02 | 3  | Abnormal pyramidal signs                        |
| hp | HP:0006817 | 1.50E-02 | 3  | Aplasia/Hypoplasia of the cerebellar vermis     |
| hp | HP:0006703 | 3.06E-02 | 2  | Aplasia/Hypoplasia of the lungs                 |
| hp | HP:0005750 | 2.37E-02 | 2  | Contractures of the joints of the lower limbs   |
| hp | HP:0005607 | 6.91E-03 | 5  | Abnormality of the tracheobronchial system      |
| hp | HP:0005445 | 2.55E-02 | 2  | Widened posterior fossa                         |
| hp | HP:0005262 | 4.67E-02 | 2  | Abnormality of the synovia                      |
| hp | HP:0005107 | 2.37E-02 | 2  | Abnormality of the sacrum                       |
| hp | HP:0004426 | 4.62E-02 | 2  | Abnormality of the cheek                        |
| hp | HP:0004372 | 3.05E-03 | 6  | Reduced consciousness/confusion                 |
| hp | HP:0004362 | 1.09E-02 | 3  | Abnormality of the enteric ganglia              |
| hp | HP:0004360 | 2.13E-02 | 5  | Abnormality of acid-base homeostasis            |
| hp | HP:0004329 | 4.61E-02 | 10 | Abnormality of the posterior segment of the eye |
| hp | HP:0004325 | 2.68E-02 | 9  | Decreased body weight                           |
| hp | HP:0004323 | 3.54E-02 | 11 | Abnormality of body weight                      |
| hp | HP:0004305 | 1.60E-02 | 5  | Involuntary movements                           |
| hp | HP:0004302 | 2.52E-02 | 3  | Functional motor problems                       |
| hp | HP:0004299 | 7.32E-03 | 6  | Hernia of the abdominal wall                    |
| hp | HP:0004298 | 5.93E-03 | 7  | Abnormality of the abdominal wall               |
| hp | HP:0003812 | 1.51E-02 | 7  | Phenotypic variability                          |
| hp | HP:0003808 | 2.35E-02 | 16 | Abnormal muscle tone                            |
| hp | HP:0003781 | 5.20E-04 | 3  | Excessive salivation                            |
| hp | HP:0003677 | 3.91E-02 | 2  | Slow progression                                |
| hp | HP:0003593 | 1.59E-03 | 8  | Infantile onset                                 |
| hp | HP:0003549 | 3.94E-02 | 12 | Abnormality of connective tissue                |
| hp | HP:0003546 | 1.87E-02 | 2  | Exercise intolerance                            |
| hp | HP:0003487 | 2.90E-02 | 3  | Babinski sign                                   |
| hp | HP:0003457 | 4.78E-02 | 2  | EMG abnormality                                 |
| hp | HP:0003287 | 1.87E-02 | 2  | Abnormality of mitochondrial metabolism         |
| hp | HP:0003128 | 5.83E-03 | 4  | Lactic acidosis                                 |
| hp | HP:0003119 | 4.57E-02 | 2  | Abnormality of lipid metabolism                 |
| hp | HP:0003117 | 3.59E-02 | 3  | Abnormality of circulating hormone level        |

|    |            |          |    |                                                         |
|----|------------|----------|----|---------------------------------------------------------|
| hp | HP:0003011 | 4.22E-02 | 21 | Abnormality of the musculature                          |
| hp | HP:0002977 | 1.12E-02 | 15 | Aplasia/Hypoplasia involving the central nervous system |
| hp | HP:0002921 | 4.88E-02 | 4  | Abnormality of the cerebrospinal fluid                  |
| hp | HP:0002837 | 2.36E-03 | 2  | Recurrent bronchitis                                    |
| hp | HP:0002827 | 2.83E-02 | 2  | Hip dislocation                                         |
| hp | HP:0002804 | 2.20E-02 | 2  | Arthrogryposis multiplex congenita                      |
| hp | HP:0002803 | 2.66E-02 | 2  | Congenital contracture                                  |
| hp | HP:0002795 | 3.62E-02 | 8  | Functional respiratory abnormality                      |
| hp | HP:0002793 | 4.18E-02 | 3  | Abnormal pattern of respiration                         |
| hp | HP:0002788 | 2.37E-02 | 2  | Recurrent upper respiratory tract infections            |
| hp | HP:0002778 | 1.22E-02 | 3  | Abnormality of the trachea                              |
| hp | HP:0002693 | 3.29E-02 | 2  | Abnormality of the skull base                           |
| hp | HP:0002683 | 4.84E-02 | 7  | Abnormality of the calvaria                             |
| hp | HP:0002634 | 2.09E-02 | 2  | Arteriosclerosis                                        |
| hp | HP:0002621 | 1.98E-02 | 2  | Atherosclerosis                                         |
| hp | HP:0002575 | 1.70E-02 | 2  | Tracheoesophageal fistula                               |
| hp | HP:0002553 | 2.60E-02 | 2  | Highly arched eyebrow                                   |
| hp | HP:0002539 | 2.08E-03 | 2  | Cortical dysplasia                                      |
| hp | HP:0002538 | 4.93E-02 | 2  | Abnormality of the cerebral cortex                      |
| hp | HP:0002516 | 6.63E-03 | 2  | Increased intracranial pressure                         |
| hp | HP:0002510 | 1.28E-02 | 2  | Spastic tetraplegia                                     |
| hp | HP:0002493 | 1.30E-02 | 13 | Upper motor neuron dysfunction                          |
| hp | HP:0002465 | 4.29E-03 | 2  | Poor speech                                             |
| hp | HP:0002445 | 1.82E-03 | 2  | Tetraplegia                                             |
| hp | HP:0002438 | 2.57E-02 | 3  | Cerebellar malformation                                 |
| hp | HP:0002360 | 2.16E-02 | 3  | Sleep disturbance                                       |
| hp | HP:0002354 | 1.76E-02 | 2  | Memory impairment                                       |
| hp | HP:0002350 | 8.48E-03 | 3  | Cerebellar cyst                                         |
| hp | HP:0002344 | 3.59E-03 | 2  | Progressive neurologic deterioration                    |
| hp | HP:0002334 | 1.72E-02 | 3  | Abnormality of the cerebellar vermis                    |
| hp | HP:0002315 | 3.91E-02 | 2  | Headache                                                |
| hp | HP:0002311 | 3.96E-02 | 4  | Incoordination                                          |
| hp | HP:0002307 | 3.94E-03 | 2  | Drooling                                                |
| hp | HP:0002270 | 7.57E-03 | 4  | Abnormality of the autonomic nervous system             |
| hp | HP:0002251 | 1.09E-02 | 3  | Aganglionic megacolon                                   |
| hp | HP:0002244 | 3.69E-02 | 2  | Abnormality of the small intestine                      |
| hp | HP:0002198 | 2.78E-02 | 2  | Dilated fourth ventricle                                |
| hp | HP:0002194 | 2.95E-03 | 2  | Delayed gross motor development                         |
| hp | HP:0002186 | 7.91E-03 | 3  | Apraxia                                                 |
| hp | HP:0002119 | 4.07E-02 | 4  | Ventriculomegaly                                        |
| hp | HP:0002109 | 2.55E-02 | 2  | Abnormality of the bronchi                              |
| hp | HP:0002104 | 2.32E-02 | 3  | Apnea                                                   |

|    |            |          |    |                                                         |
|----|------------|----------|----|---------------------------------------------------------|
| hp | HP:0002089 | 1.87E-02 | 2  | Pulmonary hypoplasia                                    |
| hp | HP:0002087 | 7.61E-03 | 6  | Abnormality of the upper respiratory tract              |
| hp | HP:0002084 | 9.07E-03 | 3  | Encephalocele                                           |
| hp | HP:0002072 | 8.19E-03 | 3  | Chorea                                                  |
| hp | HP:0002071 | 4.14E-02 | 2  | Abnormality of extrapyramidal motor function            |
| hp | HP:0002060 | 1.32E-02 | 16 | Abnormality of the cerebrum                             |
| hp | HP:0002031 | 2.53E-02 | 5  | Abnormality of the esophagus                            |
| hp | HP:0002027 | 1.29E-02 | 3  | Abdominal pain                                          |
| hp | HP:0002017 | 9.57E-03 | 5  | Nausea and vomiting                                     |
| hp | HP:0002013 | 1.61E-02 | 3  | Vomiting                                                |
| hp | HP:0002011 | 2.92E-02 | 21 | Morphological abnormality of the central nervous system |
| hp | HP:0002009 | 9.35E-04 | 2  | Potter facies                                           |
| hp | HP:0001999 | 2.96E-02 | 8  | Abnormal facial shape                                   |
| hp | HP:0001943 | 4.57E-02 | 2  | Hypoglycemia                                            |
| hp | HP:0001941 | 1.73E-02 | 5  | Acidosis                                                |
| hp | HP:0001939 | 4.05E-02 | 20 | Abnormality of metabolism/homeostasis                   |
| hp | HP:0001877 | 4.81E-02 | 5  | Abnormality of erythrocytes                             |
| hp | HP:0001829 | 2.89E-02 | 2  | Foot polydactyly                                        |
| hp | HP:0001824 | 1.69E-02 | 3  | Weight loss                                             |
| hp | HP:0001770 | 4.46E-02 | 2  | Toe syndactyly                                          |
| hp | HP:0001763 | 3.91E-02 | 2  | Pes planus                                              |
| hp | HP:0001739 | 3.01E-02 | 2  | Abnormality of the nasopharynx                          |
| hp | HP:0001710 | 2.60E-02 | 2  | Conotruncal defect                                      |
| hp | HP:0001695 | 3.75E-02 | 2  | Cardiac arrest                                          |
| hp | HP:0001649 | 7.36E-03 | 3  | Tachycardia                                             |
| hp | HP:0001645 | 3.58E-02 | 2  | Sudden cardiac death                                    |
| hp | HP:0001636 | 2.55E-02 | 2  | Tetralogy of Fallot                                     |
| hp | HP:0001626 | 3.63E-02 | 19 | Abnormality of the cardiovascular system                |
| hp | HP:0001622 | 9.07E-03 | 3  | Premature birth                                         |
| hp | HP:0001600 | 3.47E-02 | 2  | Abnormality of the larynx                               |
| hp | HP:0001562 | 7.36E-03 | 3  | Oligohydramnios                                         |
| hp | HP:0001561 | 3.86E-02 | 2  | Polyhydramnios                                          |
| hp | HP:0001560 | 1.73E-02 | 4  | Abnormality of the amniotic fluid                       |
| hp | HP:0001551 | 4.23E-03 | 5  | Abnormality of the umbilicus                            |
| hp | HP:0001537 | 3.88E-03 | 5  | Umbilical hernia                                        |
| hp | HP:0001518 | 2.37E-02 | 2  | Small for gestational age                               |
| hp | HP:0001438 | 4.93E-02 | 19 | Abnormality of the abdomen                              |
| hp | HP:0001384 | 4.57E-02 | 2  | Abnormality of the hip joint                            |
| hp | HP:0001347 | 6.72E-03 | 9  | Hyperreflexia                                           |
| hp | HP:0001337 | 1.67E-02 | 5  | Tremor                                                  |
| hp | HP:0001336 | 3.12E-02 | 2  | Myoclonus                                               |
| hp | HP:0001332 | 1.98E-03 | 6  | Dystonia                                                |

|    |            |          |    |                                                     |
|----|------------|----------|----|-----------------------------------------------------|
| hp | HP:0001320 | 1.29E-02 | 3  | Cerebellar vermis hypoplasia                        |
| hp | HP:0001319 | 2.72E-02 | 2  | Neonatal hypotonia                                  |
| hp | HP:0001317 | 2.95E-02 | 10 | Abnormality of the cerebellum                       |
| hp | HP:0001305 | 2.49E-02 | 2  | Dandy-Walker malformation                           |
| hp | HP:0001276 | 2.37E-02 | 8  | Hypertonia                                          |
| hp | HP:0001274 | 1.47E-02 | 3  | Agenesis of corpus callosum                         |
| hp | HP:0001270 | 9.18E-03 | 5  | Motor delay                                         |
| hp | HP:0001266 | 8.39E-03 | 2  | Choreoathetosis                                     |
| hp | HP:0001257 | 4.40E-02 | 5  | Spasticity                                          |
| hp | HP:0001254 | 3.06E-02 | 2  | Lethargy                                            |
| hp | HP:0001252 | 2.86E-02 | 13 | Muscular hypotonia                                  |
| hp | HP:0001251 | 1.94E-02 | 7  | Ataxia                                              |
| hp | HP:0001250 | 6.64E-03 | 17 | Seizures                                            |
| hp | HP:0001199 | 9.31E-03 | 2  | Triphalangeal thumb                                 |
| hp | HP:0001197 | 4.11E-02 | 5  | Abnormality of prenatal development or birth        |
| hp | HP:0001123 | 3.18E-02 | 2  | Visual field defect                                 |
| hp | HP:0001120 | 4.19E-02 | 2  | Abnormality of corneal size                         |
| hp | HP:0001098 | 4.56E-02 | 10 | Abnormality of the fundus                           |
| hp | HP:0001053 | 1.54E-02 | 3  | Hypopigmented skin patches                          |
| hp | HP:0001012 | 3.26E-03 | 2  | Multiple lipomas                                    |
| hp | HP:0001010 | 2.82E-02 | 3  | Hypopigmentation of the skin                        |
| hp | HP:0001005 | 2.24E-02 | 3  | Dermatological manifestations of systemic disorders |
| hp | HP:0000957 | 2.55E-02 | 2  | Cafe-au-lait spot                                   |
| hp | HP:0000932 | 2.95E-02 | 2  | Abnormality of the posterior cranial fossa          |
| hp | HP:0000929 | 1.12E-02 | 19 | Abnormality of the skull                            |
| hp | HP:0000889 | 2.78E-02 | 2  | Abnormality of the clavicle                         |
| hp | HP:0000864 | 1.69E-03 | 6  | Abnormality of the hypothalamus-pituitary axis      |
| hp | HP:0000853 | 5.41E-03 | 2  | Goiter                                              |
| hp | HP:0000834 | 5.65E-03 | 4  | Abnormality of the adrenal glands                   |
| hp | HP:0000830 | 2.32E-02 | 2  | Anterior hypopituitarism                            |
| hp | HP:0000822 | 8.45E-03 | 5  | Hypertension                                        |
| hp | HP:0000818 | 1.58E-02 | 12 | Abnormality of the endocrine system                 |
| hp | HP:0000812 | 2.14E-02 | 7  | Abnormal internal genitalia                         |
| hp | HP:0000752 | 1.88E-02 | 3  | Hyperactivity                                       |
| hp | HP:0000738 | 2.89E-02 | 2  | Hallucinations                                      |
| hp | HP:0000737 | 1.87E-02 | 2  | Irritability                                        |
| hp | HP:0000729 | 4.19E-03 | 4  | Autistic behavior                                   |
| hp | HP:0000717 | 2.66E-02 | 2  | Autism                                              |
| hp | HP:0000708 | 1.94E-03 | 15 | Behavioral abnormality                              |
| hp | HP:0000657 | 3.29E-03 | 3  | Oculomotor apraxia                                  |
| hp | HP:0000639 | 1.41E-02 | 11 | Nystagmus                                           |
| hp | HP:0000617 | 6.63E-03 | 2  | Abnormality of ocular smooth pursuit                |

|    |            |          |    |                                     |
|----|------------|----------|----|-------------------------------------|
| hp | HP:0000612 | 1.76E-02 | 3  | Iris coloboma                       |
| hp | HP:0000610 | 4.98E-02 | 2  | Abnormality of the choroid          |
| hp | HP:0000600 | 3.75E-02 | 2  | Abnormality of the pharynx          |
| hp | HP:0000589 | 1.28E-02 | 4  | Coloboma                            |
| hp | HP:0000582 | 4.72E-02 | 2  | Upslanted palpebral fissure         |
| hp | HP:0000581 | 3.24E-02 | 2  | Blepharophimosis                    |
| hp | HP:0000568 | 4.41E-02 | 2  | Microphthalmos                      |
| hp | HP:0000553 | 3.20E-02 | 5  | Abnormality of the uvea             |
| hp | HP:0000551 | 2.43E-02 | 2  | Abnormality of color vision         |
| hp | HP:0000545 | 2.44E-02 | 4  | Myopia                              |
| hp | HP:0000543 | 2.49E-02 | 2  | Optic disc pallor                   |
| hp | HP:0000539 | 2.27E-02 | 5  | Abnormality of refraction           |
| hp | HP:0000532 | 4.57E-02 | 2  | Chorioretinal abnormality           |
| hp | HP:0000525 | 1.94E-02 | 5  | Abnormality of the iris             |
| hp | HP:0000508 | 1.63E-02 | 7  | Ptosis                              |
| hp | HP:0000505 | 4.65E-02 | 7  | Visual impairment                   |
| hp | HP:0000499 | 4.19E-02 | 2  | Abnormality of the eyelashes        |
| hp | HP:0000496 | 3.18E-02 | 13 | Abnormality of eye movement         |
| hp | HP:0000492 | 4.75E-02 | 8  | Abnormality of the eyelid           |
| hp | HP:0000490 | 2.55E-02 | 2  | Deeply set eye                      |
| hp | HP:0000482 | 3.75E-02 | 2  | Microcornea                         |
| hp | HP:0000479 | 4.95E-02 | 7  | Abnormality of the retina           |
| hp | HP:0000453 | 2.03E-02 | 2  | Choanal atresia                     |
| hp | HP:0000426 | 3.97E-02 | 2  | Prominent nasal bridge              |
| hp | HP:0000415 | 2.32E-02 | 2  | Abnormality of the choanae          |
| hp | HP:0000383 | 1.65E-02 | 2  | Abnormality of periauricular region |
| hp | HP:0000368 | 3.99E-02 | 4  | Low-set, posteriorly rotated ears   |
| hp | HP:0000347 | 4.16E-02 | 6  | Micrognathia                        |
| hp | HP:0000341 | 2.60E-02 | 2  | Narrow forehead                     |
| hp | HP:0000340 | 3.29E-02 | 2  | Sloping forehead                    |
| hp | HP:0000337 | 2.03E-02 | 2  | Broad forehead                      |
| hp | HP:0000322 | 2.37E-02 | 2  | Short philtrum                      |
| hp | HP:0000316 | 1.53E-02 | 7  | Hypertelorism                       |
| hp | HP:0000315 | 3.89E-02 | 8  | Abnormality of the orbital region   |
| hp | HP:0000308 | 1.58E-03 | 2  | Microretrognathia                   |
| hp | HP:0000286 | 1.80E-02 | 5  | Epicanthus                          |
| hp | HP:0000282 | 4.29E-03 | 2  | Facial edema                        |
| hp | HP:0000278 | 2.43E-02 | 2  | Retrognathia                        |
| hp | HP:0000276 | 3.69E-02 | 2  | Long face                           |
| hp | HP:0000268 | 4.24E-02 | 2  | Dolichocephaly                      |
| hp | HP:0000260 | 7.06E-03 | 2  | Wide anterior fontanel              |
| hp | HP:0000252 | 2.92E-02 | 9  | Microcephaly                        |
| hp | HP:0000240 | 2.43E-02 | 12 | Abnormality of skull size           |

|    |            |          |    |                                                             |
|----|------------|----------|----|-------------------------------------------------------------|
| hp | HP:0000239 | 6.83E-03 | 3  | Large fontanelles                                           |
| hp | HP:0000236 | 1.38E-02 | 2  | Abnormality of the anterior fontanelle                      |
| hp | HP:0000235 | 1.60E-02 | 5  | Abnormality of the fontanelles or cranial sutures           |
| hp | HP:0000234 | 3.44E-02 | 24 | Abnormality of the head                                     |
| hp | HP:0000204 | 4.98E-02 | 2  | Cleft upper lip                                             |
| hp | HP:0000194 | 1.28E-02 | 2  | Open mouth                                                  |
| hp | HP:0000157 | 1.83E-02 | 4  | Abnormality of the tongue                                   |
| hp | HP:0000152 | 3.77E-02 | 24 | Abnormality of head or neck                                 |
| hp | HP:0000137 | 4.93E-02 | 2  | Abnormality of the ovary                                    |
| hp | HP:0000112 | 2.83E-02 | 2  | Nephropathy                                                 |
| hp | HP:0000091 | 1.54E-02 | 2  | Abnormality of the renal tubule                             |
| hp | HP:0000025 | 2.15E-02 | 2  | Functional abnormality of male internal genitalia           |
| hp | HP:0000023 | 8.77E-03 | 3  | Inguinal hernia                                             |
| hp | HP:0000008 | 1.77E-02 | 7  | Abnormality of female internal genitalia                    |
| hp | HP:0000007 | 2.77E-02 | 26 | Autosomal recessive inheritance                             |
| hp | HP:0000006 | 5.00E-02 | 16 | Autosomal dominant inheritance                              |
| hp | HP:0000005 | 3.78E-02 | 38 | Mode of inheritance                                         |
| BP | GO:2001022 | 3.99E-02 | 2  | positive regulation of response to DNA damage stimulus      |
| BP | GO:2000377 | 4.21E-02 | 3  | regulation of reactive oxygen species metabolic process     |
| BP | GO:1990778 | 4.64E-02 | 4  | protein localization to cell periphery                      |
| BP | GO:1990542 | 1.36E-02 | 2  | mitochondrial transmembrane transport                       |
| BP | GO:1904591 | 1.63E-02 | 3  | positive regulation of protein import                       |
| BP | GO:1903522 | 3.20E-02 | 4  | regulation of blood circulation                             |
| BP | GO:1901990 | 4.54E-02 | 4  | regulation of mitotic cell cycle phase transition           |
| MF | GO:1901981 | 3.87E-02 | 3  | phosphatidylinositol phosphate binding                      |
| MF | GO:1901618 | 4.77E-03 | 3  | organic hydroxy compound transmembrane transporter activity |
| BP | GO:1900182 | 2.02E-02 | 3  | positive regulation of protein localization to nucleus      |
| CC | GO:0098798 | 4.57E-02 | 3  | mitochondrial protein complex                               |
| CC | GO:0098794 | 2.74E-02 | 5  | postsynapse                                                 |
| MF | GO:0098772 | 2.50E-02 | 14 | molecular function regulator                                |
| CC | GO:0098590 | 2.33E-02 | 9  | plasma membrane region                                      |
| BP | GO:0097306 | 1.28E-02 | 3  | cellular response to alcohol                                |
| BP | GO:0097305 | 4.45E-02 | 3  | response to alcohol                                         |
| BP | GO:0097031 | 7.12E-03 | 2  | mitochondrial respiratory chain complex I biogenesis        |
| BP | GO:0090659 | 2.78E-02 | 2  | walking behavior                                            |
| BP | GO:0090075 | 9.08E-03 | 2  | relaxation of muscle                                        |
| BP | GO:0090002 | 4.93E-02 | 3  | establishment of protein localization to plasma membrane    |



|    |            |          |    |                                                                                                                                       |
|----|------------|----------|----|---------------------------------------------------------------------------------------------------------------------------------------|
| BP | GO:0072661 | 4.58E-03 | 2  | protein targeting to plasma membrane                                                                                                  |
| BP | GO:0072659 | 4.54E-02 | 4  | protein localization to plasma membrane                                                                                               |
| BP | GO:0072593 | 4.10E-02 | 4  | reactive oxygen species metabolic process                                                                                             |
| BP | GO:0071806 | 4.41E-03 | 3  | protein transmembrane transport                                                                                                       |
| BP | GO:0071805 | 4.27E-02 | 4  | potassium ion transmembrane transport                                                                                                 |
| BP | GO:0071804 | 4.27E-02 | 4  | cellular potassium ion transport                                                                                                      |
| BP | GO:0071514 | 8.07E-03 | 2  | genetic imprinting                                                                                                                    |
| BP | GO:0071407 | 1.63E-02 | 6  | cellular response to organic cyclic compound                                                                                          |
| BP | GO:0071396 | 4.76E-02 | 5  | cellular response to lipid                                                                                                            |
| BP | GO:0071383 | 4.81E-02 | 3  | cellular response to steroid hormone stimulus                                                                                         |
| BP | GO:0070482 | 2.83E-02 | 4  | response to oxygen levels                                                                                                             |
| BP | GO:0065002 | 3.28E-02 | 2  | intracellular protein transmembrane transport                                                                                         |
| BP | GO:0061647 | 1.88E-02 | 2  | histone H3-K9 modification                                                                                                            |
| BP | GO:0061384 | 9.08E-03 | 2  | heart trabecula morphogenesis                                                                                                         |
| BP | GO:0061383 | 2.47E-02 | 2  | trabecula morphogenesis                                                                                                               |
| BP | GO:0061061 | 1.89E-02 | 9  | muscle structure development                                                                                                          |
| BP | GO:0060537 | 4.53E-02 | 6  | muscle tissue development                                                                                                             |
| BP | GO:0060420 | 1.61E-02 | 2  | regulation of heart growth                                                                                                            |
| BP | GO:0060419 | 3.74E-03 | 3  | heart growth                                                                                                                          |
| BP | GO:0060122 | 1.88E-02 | 2  | inner ear receptor stereocilium organization                                                                                          |
| BP | GO:0060119 | 3.81E-02 | 2  | inner ear receptor cell development                                                                                                   |
| BP | GO:0060113 | 1.70E-02 | 3  | inner ear receptor cell differentiation                                                                                               |
| MF | GO:0060089 | 5.00E-02 | 16 | molecular transducer activity                                                                                                         |
| BP | GO:0060043 | 1.12E-02 | 2  | regulation of cardiac muscle cell proliferation                                                                                       |
| BP | GO:0060038 | 1.88E-02 | 2  | cardiac muscle cell proliferation                                                                                                     |
| BP | GO:0055117 | 4.93E-02 | 2  | regulation of cardiac muscle contraction                                                                                              |
| BP | GO:0055114 | 4.95E-02 | 12 | oxidation-reduction process                                                                                                           |
| BP | GO:0055085 | 4.29E-02 | 16 | transmembrane transport                                                                                                               |
| BP | GO:0055024 | 3.11E-02 | 2  | regulation of cardiac muscle tissue development                                                                                       |
| BP | GO:0055021 | 1.36E-02 | 2  | regulation of cardiac muscle tissue growth                                                                                            |
| BP | GO:0055017 | 2.86E-03 | 3  | cardiac muscle tissue growth                                                                                                          |
| BP | GO:0055013 | 3.63E-02 | 2  | cardiac muscle cell development                                                                                                       |
| BP | GO:0055008 | 3.81E-02 | 2  | cardiac muscle tissue morphogenesis                                                                                                   |
| BP | GO:0055006 | 4.36E-02 | 2  | cardiac cell development                                                                                                              |
| BP | GO:0055001 | 2.62E-02 | 4  | muscle cell development                                                                                                               |
| MF | GO:0052689 | 3.76E-02 | 3  | carboxylic ester hydrolase activity                                                                                                   |
| BP | GO:0051937 | 2.62E-02 | 2  | catecholamine transport                                                                                                               |
| BP | GO:0051649 | 3.92E-02 | 24 | establishment of localization in cell                                                                                                 |
| BP | GO:0051567 | 1.01E-02 | 2  | histone H3-K9 methylation                                                                                                             |
| BP | GO:0051482 | 2.01E-03 | 2  | positive regulation of cytosolic calcium ion concentration involved in phospholipase C-activating G-protein coupled signaling pathway |
| BP | GO:0051297 | 3.87E-02 | 3  | centrosome organization                                                                                                               |

|    |            |          |     |                                                      |
|----|------------|----------|-----|------------------------------------------------------|
| MF | GO:0051213 | 7.76E-03 | 3   | dioxygenase activity                                 |
| BP | GO:0051188 | 3.33E-02 | 3   | cofactor biosynthetic process                        |
| MF | GO:0051117 | 3.99E-02 | 2   | ATPase binding                                       |
| BP | GO:0051049 | 4.83E-02 | 17  | regulation of transport                              |
| BP | GO:0051046 | 3.55E-02 | 8   | regulation of secretion                              |
| MF | GO:0051015 | 4.93E-02 | 3   | actin filament binding                               |
| BP | GO:0050906 | 3.22E-02 | 3   | detection of stimulus involved in sensory perception |
| BP | GO:0050821 | 2.18E-02 | 3   | protein stabilization                                |
| BP | GO:0048771 | 1.13E-02 | 4   | tissue remodeling                                    |
| BP | GO:0048738 | 3.27E-02 | 4   | cardiac muscle tissue development                    |
| BP | GO:0048545 | 3.93E-02 | 4   | response to steroid hormone                          |
| BP | GO:0048514 | 4.93E-02 | 7   | blood vessel morphogenesis                           |
| MF | GO:0046914 | 4.15E-02 | 18  | transition metal ion binding                         |
| BP | GO:0046824 | 2.63E-02 | 3   | positive regulation of nucleocytoplasmic transport   |
| BP | GO:0046785 | 2.78E-02 | 2   | microtubule polymerization                           |
| BP | GO:0045739 | 1.36E-02 | 2   | positive regulation of DNA repair                    |
| CC | GO:0045202 | 5.65E-03 | 10  | synapse                                              |
| BP | GO:0044763 | 2.06E-02 | 106 | single-organism cellular process                     |
| BP | GO:0044743 | 2.62E-02 | 2   | intracellular protein transmembrane import           |
| BP | GO:0044708 | 9.53E-03 | 8   | single-organism behavior                             |
| BP | GO:0044700 | 1.96E-02 | 53  | single organism signaling                            |
| CC | GO:0044463 | 3.61E-02 | 9   | cell projection part                                 |
| CC | GO:0044459 | 3.75E-02 | 23  | plasma membrane part                                 |
| CC | GO:0044456 | 1.45E-02 | 7   | synapse part                                         |
| CC | GO:0044306 | 2.32E-02 | 2   | neuron projection terminus                           |
| CC | GO:0044291 | 3.81E-02 | 2   | cell-cell contact zone                               |
| BP | GO:0044057 | 1.38E-03 | 9   | regulation of system process                         |
| CC | GO:0043679 | 1.48E-02 | 2   | axon terminus                                        |
| BP | GO:0043502 | 3.11E-02 | 2   | regulation of muscle adaptation                      |
| BP | GO:0043500 | 8.77E-03 | 3   | muscle adaptation                                    |
| BP | GO:0043200 | 4.74E-02 | 2   | response to amino acid                               |
| MF | GO:0043167 | 4.13E-02 | 55  | ion binding                                          |
| BP | GO:0043087 | 3.20E-02 | 8   | regulation of GTPase activity                        |
| BP | GO:0042692 | 3.96E-02 | 6   | muscle cell differentiation                          |
| BP | GO:0042594 | 4.21E-02 | 3   | response to starvation                               |
| BP | GO:0042490 | 2.10E-02 | 3   | mechanoreceptor differentiation                      |
| BP | GO:0042472 | 4.81E-02 | 3   | inner ear morphogenesis                              |
| BP | GO:0042391 | 4.02E-02 | 6   | regulation of membrane potential                     |
| BP | GO:0042307 | 1.56E-02 | 3   | positive regulation of protein import into nucleus   |
| MF | GO:0038023 | 2.81E-02 | 13  | signaling receptor activity                          |
| BP | GO:0036293 | 2.42E-02 | 4   | response to decreased oxygen levels                  |
| BP | GO:0035873 | 1.52E-03 | 2   | lactate transmembrane transport                      |

|    |            |          |    |                                                                                                                                                                                                   |
|----|------------|----------|----|---------------------------------------------------------------------------------------------------------------------------------------------------------------------------------------------------|
| CC | GO:0035032 | 1.09E-03 | 2  | phosphatidylinositol 3-kinase complex, class III                                                                                                                                                  |
| BP | GO:0034770 | 1.09E-03 | 2  | histone H4-K20 methylation                                                                                                                                                                        |
| CC | GO:0033267 | 1.94E-02 | 3  | axon part                                                                                                                                                                                         |
| BP | GO:0033108 | 1.48E-02 | 2  | mitochondrial respiratory chain complex assembly                                                                                                                                                  |
| BP | GO:0032981 | 7.12E-03 | 2  | mitochondrial respiratory chain complex I assembly                                                                                                                                                |
| BP | GO:0032924 | 2.02E-02 | 2  | activin receptor signaling pathway                                                                                                                                                                |
| BP | GO:0031669 | 4.69E-02 | 3  | cellular response to nutrient levels                                                                                                                                                              |
| BP | GO:0031644 | 1.74E-02 | 2  | regulation of neurological system process                                                                                                                                                         |
| CC | GO:0031300 | 2.97E-02 | 5  | intrinsic component of organelle membrane                                                                                                                                                         |
| CC | GO:0031226 | 1.06E-02 | 17 | intrinsic component of plasma membrane                                                                                                                                                            |
| BP | GO:0031214 | 3.12E-02 | 3  | biomineral tissue development                                                                                                                                                                     |
| BP | GO:0031023 | 4.81E-02 | 3  | microtubule organizing center organization                                                                                                                                                        |
| BP | GO:0030534 | 2.42E-02 | 4  | adult behavior                                                                                                                                                                                    |
| MF | GO:0030507 | 7.12E-03 | 2  | spectrin binding                                                                                                                                                                                  |
| BP | GO:0030282 | 2.45E-02 | 3  | bone mineralization                                                                                                                                                                               |
| BP | GO:0030150 | 3.17E-03 | 2  | protein import into mitochondrial matrix                                                                                                                                                          |
| BP | GO:0023052 | 1.39E-02 | 54 | signaling                                                                                                                                                                                         |
| MF | GO:0022884 | 2.01E-03 | 2  | macromolecule transmembrane transporter activity                                                                                                                                                  |
| BP | GO:0021591 | 1.74E-02 | 2  | ventricular system development                                                                                                                                                                    |
| MF | GO:0019842 | 4.93E-02 | 2  | vitamin binding                                                                                                                                                                                   |
| BP | GO:0019722 | 3.33E-02 | 3  | calcium-mediated signaling                                                                                                                                                                        |
| BP | GO:0018345 | 1.61E-02 | 2  | protein palmitoylation                                                                                                                                                                            |
| BP | GO:0018231 | 8.07E-03 | 2  | peptidyl-S-diacylglycerol-L-cysteine biosynthetic process from peptidyl-cysteine                                                                                                                  |
| BP | GO:0018230 | 8.07E-03 | 2  | peptidyl-L-cysteine S-palmitoylation                                                                                                                                                              |
| BP | GO:0018198 | 2.17E-02 | 2  | peptidyl-cysteine modification                                                                                                                                                                    |
| BP | GO:0017038 | 4.45E-02 | 5  | protein import                                                                                                                                                                                    |
| MF | GO:0016747 | 4.18E-02 | 4  | transferase activity, transferring acyl groups other than amino-acyl groups                                                                                                                       |
| MF | GO:0016746 | 2.68E-02 | 5  | transferase activity, transferring acyl groups                                                                                                                                                    |
| MF | GO:0016706 | 2.62E-02 | 2  | oxidoreductase activity, acting on paired donors, with incorporation or reduction of molecular oxygen, 2-oxoglutarate as one donor, and incorporation of one atom each of oxygen into both donors |
| MF | GO:0016627 | 4.54E-02 | 2  | oxidoreductase activity, acting on the CH-CH group of donors                                                                                                                                      |
| MF | GO:0016500 | 3.85E-03 | 2  | protein-hormone receptor activity                                                                                                                                                                 |
| MF | GO:0016417 | 2.02E-02 | 2  | S-acyltransferase activity                                                                                                                                                                        |
| MF | GO:0016248 | 1.48E-02 | 2  | channel inhibitor activity                                                                                                                                                                        |
| MF | GO:0016247 | 5.50E-03 | 4  | channel regulator activity                                                                                                                                                                        |
| BP | GO:0015850 | 1.27E-02 | 5  | organic hydroxy compound transport                                                                                                                                                                |

|    |            |          |     |                                                                       |
|----|------------|----------|-----|-----------------------------------------------------------------------|
| BP | GO:0015844 | 4.17E-02 | 2   | monoamine transport                                                   |
| BP | GO:0015727 | 1.52E-03 | 2   | lactate transport                                                     |
| BP | GO:0015672 | 4.21E-02 | 8   | monovalent inorganic cation transport                                 |
| MF | GO:0015450 | 7.34E-04 | 2   | P-P-bond-hydrolysis-driven protein transmembrane transporter activity |
| MF | GO:0015129 | 1.52E-03 | 2   | lactate transmembrane transporter activity                            |
| BP | GO:0014898 | 2.56E-03 | 2   | cardiac muscle hypertrophy in response to stress                      |
| BP | GO:0014897 | 3.14E-03 | 3   | striated muscle hypertrophy                                           |
| BP | GO:0014896 | 3.14E-03 | 3   | muscle hypertrophy                                                    |
| BP | GO:0014888 | 1.61E-02 | 2   | striated muscle adaptation                                            |
| BP | GO:0014887 | 2.56E-03 | 2   | cardiac muscle adaptation                                             |
| BP | GO:0014855 | 3.99E-02 | 2   | striated muscle cell proliferation                                    |
| BP | GO:0014743 | 1.36E-02 | 2   | regulation of muscle hypertrophy                                      |
| BP | GO:0014742 | 3.85E-03 | 2   | positive regulation of muscle hypertrophy                             |
| BP | GO:0014706 | 3.55E-02 | 6   | striated muscle tissue development                                    |
| CC | GO:0014069 | 1.26E-02 | 4   | postsynaptic density                                                  |
| BP | GO:0010633 | 3.45E-02 | 2   | negative regulation of epithelial cell migration                      |
| BP | GO:0010613 | 3.85E-03 | 2   | positive regulation of cardiac muscle hypertrophy                     |
| BP | GO:0010611 | 1.24E-02 | 2   | regulation of cardiac muscle hypertrophy                              |
| BP | GO:0010596 | 1.48E-02 | 2   | negative regulation of endothelial cell migration                     |
| BP | GO:0010501 | 2.95E-02 | 2   | RNA secondary structure unwinding                                     |
| CC | GO:0010494 | 1.36E-02 | 2   | cytoplasmic stress granule                                            |
| BP | GO:0010257 | 7.12E-03 | 2   | NADH dehydrogenase complex assembly                                   |
| BP | GO:0009987 | 3.15E-02 | 128 | cellular process                                                      |
| BP | GO:0009755 | 9.69E-03 | 4   | hormone-mediated signaling pathway                                    |
| BP | GO:0009653 | 3.10E-02 | 28  | anatomical structure morphogenesis                                    |
| BP | GO:0009628 | 2.87E-02 | 11  | response to abiotic stimulus                                          |
| BP | GO:0009267 | 3.54E-02 | 3   | cellular response to starvation                                       |
| BP | GO:0009108 | 2.10E-02 | 3   | coenzyme biosynthetic process                                         |
| BP | GO:0008344 | 2.63E-02 | 3   | adult locomotory behavior                                             |
| MF | GO:0008320 | 1.09E-03 | 2   | protein transmembrane transporter activity                            |
| MF | GO:0008270 | 1.67E-02 | 17  | zinc ion binding                                                      |
| MF | GO:0008200 | 1.36E-02 | 2   | ion channel inhibitor activity                                        |
| MF | GO:0008092 | 4.03E-02 | 11  | cytoskeletal protein binding                                          |
| MF | GO:0008083 | 4.93E-02 | 3   | growth factor activity                                                |
| MF | GO:0008028 | 3.63E-02 | 2   | monocarboxylic acid transmembrane transporter activity                |
| BP | GO:0007628 | 2.78E-02 | 2   | adult walking behavior                                                |
| BP | GO:0007626 | 7.73E-03 | 6   | locomotory behavior                                                   |
| BP | GO:0007528 | 3.28E-02 | 2   | neuromuscular junction development                                    |
| BP | GO:0007270 | 1.35E-02 | 4   | neuron-neuron synaptic transmission                                   |
| BP | GO:0007215 | 4.74E-02 | 2   | glutamate receptor signaling pathway                                  |
| BP | GO:0007204 | 4.81E-02 | 3   | positive regulation of cytosolic calcium ion                          |

|    |            |          |    |                                                                         |
|----|------------|----------|----|-------------------------------------------------------------------------|
|    |            |          |    | concentration                                                           |
| BP | GO:0007200 | 1.70E-03 | 4  | phospholipase C-activating G-protein coupled receptor signaling pathway |
| BP | GO:0007165 | 2.45E-02 | 49 | signal transduction                                                     |
| BP | GO:0007154 | 2.77E-02 | 53 | cell communication                                                      |
| BP | GO:0007098 | 1.94E-02 | 3  | centrosome cycle                                                        |
| BP | GO:0007009 | 4.16E-02 | 5  | plasma membrane organization                                            |
| BP | GO:0006914 | 4.02E-02 | 6  | autophagy                                                               |
| BP | GO:0006893 | 3.11E-02 | 2  | Golgi to plasma membrane transport                                      |
| BP | GO:0006886 | 4.00E-02 | 12 | intracellular protein transport                                         |
| BP | GO:0006821 | 3.87E-02 | 3  | chloride transport                                                      |
| BP | GO:0006612 | 2.54E-02 | 3  | protein targeting to membrane                                           |
| BP | GO:0006605 | 6.88E-03 | 10 | protein targeting                                                       |
| BP | GO:0006400 | 4.36E-02 | 2  | tRNA modification                                                       |
| BP | GO:0006349 | 3.85E-03 | 2  | regulation of gene expression by genetic imprinting                     |
| BP | GO:0006275 | 2.36E-02 | 3  | regulation of DNA replication                                           |
| CC | GO:0005942 | 1.24E-02 | 2  | phosphatidylinositol 3-kinase complex                                   |
| CC | GO:0005887 | 1.42E-02 | 16 | integral component of plasma membrane                                   |
| CC | GO:0005776 | 4.17E-02 | 2  | autophagosome                                                           |
| MF | GO:0005251 | 2.17E-02 | 2  | delayed rectifier potassium channel activity                            |
| MF | GO:0005057 | 3.22E-02 | 3  | receptor signaling protein activity                                     |
| MF | GO:0004930 | 4.02E-02 | 8  | G-protein coupled receptor activity                                     |
| MF | GO:0004871 | 1.86E-02 | 16 | signal transducer activity                                              |
| MF | GO:0003725 | 3.99E-02 | 2  | double-stranded RNA binding                                             |
| BP | GO:0003300 | 2.60E-03 | 3  | cardiac muscle hypertrophy                                              |
| BP | GO:0003299 | 2.56E-03 | 2  | muscle hypertrophy in response to stress                                |
| BP | GO:0003230 | 1.36E-02 | 2  | cardiac atrium development                                              |
| BP | GO:0003012 | 1.37E-02 | 6  | muscle system process                                                   |
| BP | GO:0003008 | 2.18E-02 | 17 | system process                                                          |
| BP | GO:0002066 | 4.74E-02 | 2  | columnar/cuboidal epithelial cell development                           |
| BP | GO:0001881 | 1.48E-02 | 2  | receptor recycling                                                      |
| BP | GO:0001666 | 2.42E-02 | 4  | response to hypoxia                                                     |
| CC | GO:0000407 | 1.88E-02 | 2  | pre-autophagosomal structure                                            |
| BP | GO:0000186 | 3.28E-02 | 2  | activation of MAPKK activity                                            |
