# Supplementary material
Source: PubMed Central journal article supplement (PMC4856766)
Supplement: cr201644x25.pdf [file cr201644x25.pdf]

**Supplementary information, Table S16** Functional enrichment categories of PSGs reported by Rubin and colleagues in layer lines(LR). Categories associated with vision-related function are marked in green.

| Term | Term ID    | P-value  | Gene number | Descriptions                                            |
|------|------------|----------|-------------|---------------------------------------------------------|
| ke   | KEGG:04020 | 5.00E-02 | 7           | Calcium signaling pathway                               |
| hp   | HP:0100699 | 4.36E-02 | 2           | Scarring                                                |
| hp   | HP:0100689 | 2.51E-02 | 2           | Decreased corneal thickness                             |
| hp   | HP:0100659 | 1.15E-02 | 3           | Abnormality of the cerebral vasculature                 |
| hp   | HP:0100491 | 1.76E-02 | 5           | Abnormality of lower limb joint                         |
| hp   | HP:0040195 | 3.67E-02 | 7           | Decreased head circumference                            |
| hp   | HP:0030453 | 1.00E-02 | 4           | Abnormal visual electrophysiology                       |
| hp   | HP:0030319 | 8.98E-03 | 3           | Weakness of facial musculature                          |
| hp   | HP:0030311 | 2.69E-02 | 2           | Lower extremity joint dislocation                       |
| hp   | HP:0030178 | 8.04E-03 | 4           | Abnormality of central nervous system electrophysiology |
| hp   | HP:0012823 | 3.85E-02 | 11          | Clinical modifier                                       |
| hp   | HP:0012758 | 3.58E-02 | 10          | Neurodevelopmental delay                                |
| hp   | HP:0012547 | 4.54E-02 | 7           | Abnormal involuntary eye movements                      |
| hp   | HP:0012503 | 3.29E-02 | 2           | Abnormality of the pituitary gland                      |
| hp   | HP:0012387 | 4.48E-03 | 2           | Bronchitis                                              |
| hp   | HP:0012265 | 3.63E-03 | 2           | Ciliary dyskinesia                                      |
| hp   | HP:0012262 | 3.91E-03 | 2           | Abnormal ciliary motility                               |
| hp   | HP:0012261 | 3.91E-03 | 2           | Abnormal respiratory motile cilium physiology           |
| hp   | HP:0012223 | 4.29E-05 | 2           | Splenic rupture                                         |
| hp   | HP:0011900 | 2.91E-04 | 2           | Hypofibrinogenemia                                      |
| hp   | HP:0011898 | 2.91E-04 | 2           | Abnormality of circulating fibrinogen                   |
| hp   | HP:0011843 | 4.13E-02 | 4           | Abnormality of skeletal physiology                      |
| hp   | HP:0011842 | 8.18E-03 | 22          | Abnormality of skeletal morphology                      |
| hp   | HP:0011830 | 3.88E-02 | 2           | Abnormality of oral mucosa                              |
| hp   | HP:0011821 | 1.87E-02 | 9           | Abnormality of facial skeleton                          |
| hp   | HP:0011799 | 2.42E-02 | 3           | Abnormality of facial soft tissue                       |
| hp   | HP:0011747 | 3.15E-02 | 2           | Abnormality of the anterior pituitary                   |
| hp   | HP:0011733 | 1.96E-02 | 2           | Abnormality of adrenal physiology                       |
| hp   | HP:0011675 | 3.43E-02 | 4           | Arrhythmia                                              |
| hp   | HP:0011492 | 4.31E-02 | 2           | Abnormality of corneal stroma                           |
| hp   | HP:0011486 | 2.60E-02 | 2           | Abnormality of corneal thickness                        |
| hp   | HP:0011463 | 9.18E-03 | 2           | Childhood onset                                         |
| hp   | HP:0011389 | 1.66E-02 | 8           | Functional abnormality of the inner ear                 |
| hp   | HP:0011198 | 6.35E-03 | 2           | EEG with generalized epileptiform discharges            |
| hp   | HP:0011182 | 6.69E-03 | 2           | Epileptiform EEG discharges                             |

|    |            |          |    |                                                          |
|----|------------|----------|----|----------------------------------------------------------|
| hp | HP:0011039 | 1.96E-02 | 2  | Abnormality of the helix                                 |
| hp | HP:0011029 | 4.23E-02 | 2  | Internal hemorrhage                                      |
| hp | HP:0011028 | 4.23E-02 | 2  | Abnormality of blood circulation                         |
| hp | HP:0011025 | 6.49E-03 | 10 | Abnormality of cardiovascular system physiology          |
| hp | HP:0010991 | 1.44E-02 | 2  | Abnormality of the abdominal musculature                 |
| hp | HP:0010990 | 1.56E-03 | 2  | Abnormality of the common coagulation pathway            |
| hp | HP:0010827 | 8.74E-03 | 3  | Abnormality of the seventh cranial nerve                 |
| hp | HP:0010696 | 3.11E-03 | 2  | Polar cataract                                           |
| hp | HP:0010628 | 8.74E-03 | 3  | Facial palsy                                             |
| hp | HP:0010549 | 4.66E-02 | 3  | Weakness due to upper motor neuron dysfunction           |
| hp | HP:0010490 | 3.24E-02 | 2  | Abnormality of the palmar creases                        |
| hp | HP:0010460 | 4.34E-02 | 5  | Abnormality of the female genitalia                      |
| hp | HP:0010318 | 1.11E-02 | 2  | Aplasia/Hypoplasia of the abdominal wall musculature     |
| hp | HP:0009122 | 3.44E-02 | 6  | Aplasia/hypoplasia affecting bones of the axial skeleton |
| hp | HP:0009121 | 1.39E-02 | 18 | Abnormal axial skeleton morphology                       |
| hp | HP:0009118 | 2.32E-02 | 6  | Aplasia/Hypoplasia of the mandible                       |
| hp | HP:0009116 | 2.42E-02 | 6  | Aplasia/Hypoplasia involving bones of the skull          |
| hp | HP:0008736 | 2.61E-02 | 4  | Hypoplasia of penis                                      |
| hp | HP:0008678 | 4.82E-02 | 2  | Renal hypoplasia/aplasia                                 |
| hp | HP:0008373 | 4.59E-02 | 3  | Puberty and gonadal disorders                            |
| hp | HP:0008064 | 3.43E-02 | 2  | Ichthyosis                                               |
| hp | HP:0008048 | 2.17E-03 | 2  | Abnormality of the line of Schwalbe                      |
| hp | HP:0008047 | 3.97E-02 | 2  | Abnormality of the vasculature of the eye                |
| hp | HP:0008046 | 3.61E-02 | 2  | Abnormality of the retinal vasculature                   |
| hp | HP:0008034 | 1.48E-02 | 2  | Abnormal iris pigmentation                               |
| hp | HP:0007759 | 4.27E-02 | 2  | Opacification of the corneal stroma                      |
| hp | HP:0007703 | 3.69E-02 | 4  | Abnormality of retinal pigmentation                      |
| hp | HP:0007663 | 8.74E-03 | 3  | Reduced visual acuity                                    |
| hp | HP:0007477 | 4.49E-02 | 2  | Abnormal dermatoglyphics                                 |
| hp | HP:0006824 | 1.93E-02 | 3  | Cranial nerve paralysis                                  |
| hp | HP:0006703 | 2.23E-02 | 2  | Aplasia/Hypoplasia of the lungs                          |
| hp | HP:0005978 | 2.78E-02 | 2  | Type II diabetes mellitus                                |
| hp | HP:0005268 | 1.03E-03 | 2  | Spontaneous abortion                                     |
| hp | HP:0005262 | 1.26E-02 | 3  | Abnormality of the synovia                               |
| hp | HP:0004936 | 7.72E-03 | 2  | Venous thrombosis                                        |
| hp | HP:0004418 | 3.37E-03 | 2  | Thrombophlebitis                                         |
| hp | HP:0004374 | 4.82E-02 | 2  | Hemiplegia/hemiparesis                                   |

|    |            |          |    |                                                |
|----|------------|----------|----|------------------------------------------------|
| hp | HP:0004348 | 3.14E-02 | 5  | Abnormality of bone mineral density            |
| hp | HP:0004328 | 1.13E-02 | 11 | Abnormality of the anterior segment of the eye |
| hp | HP:0004324 | 2.20E-02 | 4  | Increased body weight                          |
| hp | HP:0003828 | 4.31E-02 | 2  | Variable expressivity                          |
| hp | HP:0003745 | 1.31E-02 | 2  | Sporadic                                       |
| hp | HP:0003674 | 3.59E-02 | 8  | Onset                                          |
| hp | HP:0003577 | 4.61E-02 | 2  | Congenital onset                               |
| hp | HP:0003457 | 3.65E-02 | 2  | EMG abnormality                                |
| hp | HP:0003256 | 9.18E-03 | 2  | Abnormality of the coagulation cascade         |
| hp | HP:0003241 | 3.17E-02 | 4  | External genital hypoplasia                    |
| hp | HP:0003117 | 2.42E-02 | 3  | Abnormality of circulating hormone level       |
| hp | HP:0002837 | 1.56E-03 | 2  | Recurrent bronchitis                           |
| hp | HP:0002827 | 2.05E-02 | 2  | Hip dislocation                                |
| hp | HP:0002817 | 4.24E-02 | 9  | Abnormality of the upper limb                  |
| hp | HP:0002815 | 2.75E-02 | 3  | Abnormality of the knees                       |
| hp | HP:0002808 | 3.75E-02 | 3  | Kyphosis                                       |
| hp | HP:0002804 | 1.57E-02 | 2  | Arthrogryposis multiplex congenita             |
| hp | HP:0002803 | 1.92E-02 | 2  | Congenital contracture                         |
| hp | HP:0002795 | 1.65E-02 | 8  | Functional respiratory abnormality             |
| hp | HP:0002788 | 3.67E-03 | 3  | Recurrent upper respiratory tract infections   |
| hp | HP:0002750 | 4.70E-02 | 2  | Delayed skeletal maturation                    |
| hp | HP:0002652 | 4.01E-02 | 2  | Skeletal dysplasia                             |
| hp | HP:0002539 | 1.37E-03 | 2  | Cortical dysplasia                             |
| hp | HP:0002538 | 3.79E-02 | 2  | Abnormality of the cerebral cortex             |
| hp | HP:0002521 | 6.02E-03 | 2  | Hypsarrhythmia                                 |
| hp | HP:0002510 | 8.81E-03 | 2  | Spastic tetraplegia                            |
| hp | HP:0002360 | 3.74E-02 | 2  | Sleep disturbance                              |
| hp | HP:0002353 | 6.27E-03 | 4  | EEG abnormality                                |
| hp | HP:0002269 | 1.40E-02 | 4  | Abnormality of neuronal migration              |
| hp | HP:0002239 | 2.37E-02 | 2  | Gastrointestinal hemorrhage                    |
| hp | HP:0002170 | 9.94E-03 | 2  | Intracranial hemorrhage                        |
| hp | HP:0002110 | 8.08E-03 | 2  | Bronchiectasis                                 |
| hp | HP:0002109 | 1.83E-02 | 2  | Abnormality of the bronchi                     |
| hp | HP:0002093 | 1.86E-02 | 6  | Respiratory insufficiency                      |
| hp | HP:0002089 | 1.31E-02 | 2  | Pulmonary hypoplasia                           |
| hp | HP:0002071 | 3.11E-02 | 2  | Abnormality of extrapyramidal motor function   |
| hp | HP:0001999 | 4.07E-02 | 6  | Abnormal facial shape                          |
| hp | HP:0001977 | 1.27E-02 | 2  | Abnormal thrombosis                            |
| hp | HP:0001933 | 4.01E-02 | 2  | Subcutaneous hemorrhage                        |
| hp | HP:0001928 | 4.87E-03 | 4  | Abnormality of coagulation                     |
| hp | HP:0001892 | 1.09E-02 | 5  | Abnormal bleeding                              |
| hp | HP:0001850 | 2.19E-02 | 2  | Abnormality of the tarsal bones                |
| hp | HP:0001787 | 4.19E-03 | 2  | Abnormal delivery                              |

|    |            |          |    |                                              |
|----|------------|----------|----|----------------------------------------------|
| hp | HP:0001761 | 4.78E-02 | 2  | Pes cavus                                    |
| hp | HP:0001739 | 5.56E-03 | 3  | Abnormality of the nasopharynx               |
| hp | HP:0001710 | 1.87E-02 | 2  | Conotruncal defect                           |
| hp | HP:0001695 | 2.78E-02 | 2  | Cardiac arrest                               |
| hp | HP:0001649 | 4.31E-03 | 3  | Tachycardia                                  |
| hp | HP:0001645 | 2.65E-02 | 2  | Sudden cardiac death                         |
| hp | HP:0001639 | 3.95E-02 | 3  | Hypertrophic cardiomyopathy                  |
| hp | HP:0001636 | 1.83E-02 | 2  | Tetralogy of Fallot                          |
| hp | HP:0001626 | 3.05E-02 | 16 | Abnormality of the cardiovascular system     |
| hp | HP:0001622 | 5.37E-03 | 3  | Premature birth                              |
| hp | HP:0001608 | 1.00E-02 | 4  | Abnormality of the voice                     |
| hp | HP:0001561 | 2.88E-02 | 2  | Polyhydramnios                               |
| hp | HP:0001513 | 1.92E-02 | 4  | Obesity                                      |
| hp | HP:0001399 | 4.44E-02 | 2  | Hepatic failure                              |
| hp | HP:0001386 | 3.37E-03 | 2  | Joint swelling                               |
| hp | HP:0001384 | 1.20E-02 | 3  | Abnormality of the hip joint                 |
| hp | HP:0001373 | 4.98E-02 | 2  | Joint dislocation                            |
| hp | HP:0001367 | 3.29E-02 | 10 | Abnormal joint morphology                    |
| hp | HP:0001347 | 4.16E-02 | 5  | Hyperreflexia                                |
| hp | HP:0001324 | 4.91E-02 | 6  | Muscle weakness                              |
| hp | HP:0001319 | 1.96E-02 | 2  | Neonatal hypotonia                           |
| hp | HP:0001311 | 2.15E-02 | 4  | Abnormal nervous system electrophysiology    |
| hp | HP:0001291 | 2.38E-02 | 3  | Abnormality of the cranial nerves            |
| hp | HP:0001284 | 3.83E-02 | 2  | Areflexia                                    |
| hp | HP:0001279 | 2.62E-03 | 2  | Syncope                                      |
| hp | HP:0001270 | 1.29E-02 | 4  | Motor delay                                  |
| hp | HP:0001268 | 4.57E-02 | 2  | Mental deterioration                         |
| hp | HP:0001256 | 1.74E-02 | 2  | Intellectual disability, mild                |
| hp | HP:0001250 | 3.80E-02 | 11 | Seizures                                     |
| hp | HP:0001249 | 2.65E-02 | 10 | Intellectual disability                      |
| hp | HP:0001197 | 1.13E-02 | 6  | Abnormality of prenatal development or birth |
| hp | HP:0001018 | 3.24E-02 | 2  | Abnormal palmar dermatoglyphics              |
| hp | HP:0000987 | 4.18E-02 | 2  | Atypical scarring of skin                    |
| hp | HP:0000954 | 2.55E-02 | 2  | Single transverse palmar crease              |
| hp | HP:0000929 | 1.75E-02 | 15 | Abnormality of the skull                     |
| hp | HP:0000927 | 2.75E-02 | 3  | Abnormality of skeletal maturation           |
| hp | HP:0000924 | 1.40E-02 | 22 | Abnormality of the skeletal system           |
| hp | HP:0000858 | 2.00E-02 | 3  | Menstrual irregularities                     |
| hp | HP:0000842 | 2.60E-02 | 2  | Hyperinsulinemia                             |
| hp | HP:0000834 | 3.34E-02 | 2  | Abnormality of the adrenal glands            |
| hp | HP:0000822 | 1.20E-02 | 4  | Hypertension                                 |
| hp | HP:0000819 | 3.71E-02 | 3  | Diabetes mellitus                            |
| hp | HP:0000818 | 8.34E-03 | 11 | Abnormality of the endocrine system          |

|    |            |          |    |                                           |
|----|------------|----------|----|-------------------------------------------|
| hp | HP:0000752 | 1.17E-02 | 3  | Hyperactivity                             |
| hp | HP:0000750 | 2.52E-02 | 3  | Delayed speech and language development   |
| hp | HP:0000729 | 2.92E-02 | 2  | Autistic behavior                         |
| hp | HP:0000708 | 4.26E-02 | 8  | Behavioral abnormality                    |
| hp | HP:0000662 | 1.81E-02 | 3  | Nyctalopia                                |
| hp | HP:0000639 | 4.49E-02 | 7  | Nystagmus                                 |
| hp | HP:0000627 | 1.95E-03 | 2  | Posterior embryotoxon                     |
| hp | HP:0000613 | 4.53E-02 | 2  | Photophobia                               |
| hp | HP:0000600 | 8.28E-03 | 3  | Abnormality of the pharynx                |
| hp | HP:0000598 | 3.21E-02 | 14 | Abnormality of the ear                    |
| hp | HP:0000597 | 2.65E-02 | 3  | Ophthalmoparesis                          |
| hp | HP:0000580 | 1.04E-02 | 4  | Pigmentary retinopathy                    |
| hp | HP:0000556 | 1.31E-02 | 4  | Retinal dystrophy                         |
| hp | HP:0000525 | 4.63E-02 | 3  | Abnormality of the iris                   |
| hp | HP:0000518 | 3.56E-02 | 6  | Cataract                                  |
| hp | HP:0000517 | 2.26E-02 | 7  | Abnormality of the lens                   |
| hp | HP:0000512 | 5.97E-03 | 4  | Abnormal electroretinogram                |
| hp | HP:0000510 | 3.14E-03 | 4  | Rod-cone dystrophy                        |
| hp | HP:0000508 | 3.04E-02 | 5  | Ptosis                                    |
| hp | HP:0000505 | 2.49E-02 | 7  | Visual impairment                         |
| hp | HP:0000504 | 4.47E-02 | 7  | Abnormality of vision                     |
| hp | HP:0000501 | 7.52E-03 | 5  | Glaucoma                                  |
| hp | HP:0000481 | 4.13E-02 | 5  | Abnormality of the cornea                 |
| hp | HP:0000421 | 1.20E-03 | 3  | Epistaxis                                 |
| hp | HP:0000407 | 2.60E-02 | 7  | Sensorineural hearing impairment          |
| hp | HP:0000403 | 6.35E-03 | 2  | Recurrent otitis media                    |
| hp | HP:0000388 | 3.38E-02 | 2  | Otitis media                              |
| hp | HP:0000370 | 3.20E-02 | 4  | Abnormality of the middle ear             |
| hp | HP:0000368 | 4.82E-02 | 3  | Low-set, posteriorly rotated ears         |
| hp | HP:0000366 | 2.73E-02 | 11 | Abnormality of the nose                   |
| hp | HP:0000359 | 1.71E-02 | 8  | Abnormality of the inner ear              |
| hp | HP:0000358 | 3.46E-02 | 4  | Posteriorly rotated ears                  |
| hp | HP:0000347 | 2.30E-02 | 6  | Micrognathia                              |
| hp | HP:0000301 | 1.04E-02 | 3  | Abnormality of facial musculature         |
| hp | HP:0000280 | 4.01E-02 | 2  | Coarse facial features                    |
| hp | HP:0000277 | 3.96E-02 | 6  | Abnormality of the mandible               |
| hp | HP:0000271 | 1.87E-02 | 19 | Abnormality of the face                   |
| hp | HP:0000268 | 3.20E-02 | 2  | Dolichocephaly                            |
| hp | HP:0000252 | 3.67E-02 | 7  | Microcephaly                              |
| hp | HP:0000246 | 2.19E-02 | 2  | Sinusitis                                 |
| hp | HP:0000245 | 2.69E-02 | 2  | Abnormality of the paranasal sinuses      |
| hp | HP:0000240 | 3.75E-02 | 9  | Abnormality of skull size                 |
| hp | HP:0000235 | 4.19E-02 | 3  | Abnormality of the fontanelles or cranial |

|    |            |          |    |                                     |
|----|------------|----------|----|-------------------------------------|
|    |            |          |    | sutures                             |
| hp | HP:0000234 | 1.08E-02 | 22 | Abnormality of the head             |
| hp | HP:0000225 | 1.95E-03 | 2  | Gingival bleeding                   |
| hp | HP:0000168 | 2.69E-02 | 2  | Abnormality of the gingiva          |
| hp | HP:0000157 | 2.69E-02 | 3  | Abnormality of the tongue           |
| hp | HP:0000152 | 1.23E-02 | 22 | Abnormality of head or neck         |
| hp | HP:0000144 | 2.46E-02 | 2  | Decreased fertility                 |
| hp | HP:0000140 | 1.81E-02 | 3  | Abnormality of the menstrual cycle  |
| hp | HP:0000113 | 1.23E-02 | 2  | Polycystic kidney dysplasia         |
| hp | HP:0000112 | 2.05E-02 | 2  | Nephropathy                         |
| hp | HP:0000107 | 2.32E-02 | 3  | Renal cyst                          |
| hp | HP:0000100 | 2.05E-02 | 2  | Nephrotic syndrome                  |
| hp | HP:0000050 | 3.00E-02 | 4  | Hypoplastic male external genitalia |
| hp | HP:0000036 | 4.52E-02 | 5  | Abnormality of the penis            |
| hp | HP:0000035 | 4.59E-02 | 6  | Abnormality of the testis           |
| hp | HP:0000014 | 4.65E-02 | 2  | Abnormality of the bladder          |
| hp | HP:0000007 | 2.00E-02 | 22 | Autosomal recessive inheritance     |
| hp | HP:0000006 | 5.00E-02 | 13 | Autosomal dominant inheritance      |
| hp | HP:0000005 | 1.77E-02 | 32 | Mode of inheritance                 |
| hp | HP:0000003 | 2.92E-02 | 2  | Multicystic kidney dysplasia        |
| BP | GO:0051049 | 5.00E-02 | 27 | regulation of transport             |
| MF | GO:0004908 | 7.64E-03 | 4  | interleukin-1 receptor activity     |
